# 1 **Diffusion Kurtosis Imaging of neonatal Spinal Cord in clinical routine**

2 Rosella Trò<sup>1\*</sup>, Monica Roascio<sup>1</sup>, Domenico Tortora<sup>2</sup>, Mariasavina Severino<sup>2</sup>, Andrea Rossi<sup>2,3</sup>,  
3 Julien Cohen-Adad<sup>4,5,6</sup>, Marco Massimo Fato<sup>1†</sup>, Gabriele Arnulfo<sup>1,7†</sup>

4 From the <sup>1</sup>Department of Informatics, Bioengineering, Robotics and System Engineering (DIBRIS),  
5 University of Genoa, Genoa, Italy; <sup>2</sup>Neuroradiology Unit, Istituto Giannina Gaslini, Genoa, Italy;  
6 <sup>3</sup>Department of Health Sciences (DISSAL), University of Genoa, Genoa, Italy; <sup>4</sup>NeuroPoly Lab,  
7 Institute of Biomedical Engineering, Polytechnique Montreal, Montreal, QC, Canada; <sup>5</sup>Functional  
8 Neuroimaging Unit, CRIUGM, Université de Montréal, Montreal, QC, Canada; <sup>6</sup>Mila - Quebec AI  
9 Institute, Montreal, QC, Canada; <sup>7</sup>Neuroscience Center, Helsinki Institute of Life Science,  
10 University of Helsinki, Helsinki, Finland  
11

12 \*Corresponding author. Department of Informatics, Bioengineering, Robotics and System  
13 Engineering (DIBRIS), University of Genoa, Via all'Opera Pia, 13, 16145 Genoa, Italy,  
14 [rosella.tro@edu.unige.it](mailto:rosella.tro@edu.unige.it)

15 †These authors have contributed equally to this work and share last authorship

## 16 **Abstract**

17 Diffusion Kurtosis Imaging (DKI) has undisputed advantages over more classical diffusion  
18 Magnetic Resonance Imaging (dMRI), as witnessed by a fast-increasing number of clinical  
19 applications and software packages widely adopted in brain imaging. However, in the neonatal  
20 setting, DKI is still largely underutilized in Spinal Cord (SC) imaging because of its inherently  
21 demanding technological requirements.

22 Due to its extreme sensitivity to non-gaussian diffusion, DKI proves particularly suitable for  
23 detecting complex, subtle, fast microstructural changes occurring in this area at this early and  
24 critical stage of development, and not identifiable with only DTI. Given the multiplicity of  
25 congenital anomalies of the spinal canal, their crucial effect on later developmental outcome, and  
26 the close interconnection between SC region and the above brain, managing to apply such a method  
27 to neonatal cohort becomes of utmost importance.

28 This study will (i) review the current methodological challenges associated with application of  
29 advanced dMRI methods like DKI in early infancy, (ii) illustrate the first semi-automated pipeline  
30 built on Spinal Cord Toolbox (SCT) for handling with DKI data of neonatal SC, from acquisition  
31 setting to estimation of diffusion measures, through accurate adjustment of processing algorithms  
32 customized for adult SC, and (iii) present preliminary results of its application in a pilot clinical  
33 case study.  
34 Results of this application agree with findings achieved in a corresponding adult survey, thus  
35 confirming validity of adopted pipeline and diagnostic value of DKI in pediatrics.

## 36 Keywords

37 Spinal Cord, DTI, DKI, image processing pipeline, neonatal imaging, punctate white matter lesions

## 38 1. Introduction

39 In recent years, an increasing number of works in the field of neuroimaging are stressing the  
40 importance to move beyond simplistic assumptions of Diffusion Tensor Imaging (DTI) model (1)  
41 towards more advanced diffusion MRI (dMRI) methods, among which DKI (2) is one of the most  
42 promising (3–5).

43 Within existing non-standard techniques, DKI has indeed turned out to be especially suitable for  
44 imaging of SC, a structure where the assumption of Gaussian diffusion fails (6). Indeed, the  
45 presence of Gray Matter (GM) in the central portion contains a significant amount of cell  
46 membranes and organelles that limits diffusion to fewer directions. Taking into account  
47 pathological processes not following a Gaussian distribution, DKI provides a better understanding  
48 of the underlying micromolecular environment. In fact, it exhibits increased sensitivity in  
49 microstructural assessment of both White Matter (WM) and GM (7). Hence this susceptibility  
50 translates into an increased amount of diagnostic information, beyond that obtained with routine  
51 diffusion metrics.

52 Reduced field-of-view mitigates susceptibility artifacts and cardiac/respiratory gating allows to  
53 overcome most of the methodological challenges inherent to adult SC imaging (8). Thanks to these  
54 strategies, DKI by now represents a promising tool for studying a plethora of spine disorders with  
55 minor modifications to protocol parameters in use for brain imaging (9–14).

56 The scenario becomes definitely more complicated when attempting to translate this imaging  
57 technique to the pediatric clinical setting (15,16). Typical issues inherent to SC district include  
58 small cross-sectional area requiring high spatial resolution, interface between regions with different  
59 magnetic properties, Partial Volume Effect (PVE) of pulsating Cerebro-Spinal Fluid (CSF) with  
60 each heartbeat, and bulk physiologic motion due to proximity of heart and pulmonary parenchyma.  
61 This scenario is further complicated here from a multiplicity of factors related to the age range  
62 under analysis. Children in general have smaller anatomical structures - which in turn might result  
63 in higher risk of radiofrequency heating effects - and move more frequently (e.g. tongue sucking  
64 motion). On the other hand, artifact-reducing techniques (i.e. cardiac gating, respiratory  
65 compensation, and suppression sequences) (17) are often unfeasible since time-consuming, and  
66 sedation is typically not desirable. All aforementioned issues result in artifact-laden, low-signal  
67 images, which are often suboptimal for diagnostic evaluation.

68 Adopted solutions for improving image resolution and reducing artifacts comprise induction of  
69 natural sleep (by feeding the patient immediately before MR examination), the use of a vacuum  
70 fixation pillow to wrap the patient, and use of special ear muffs to protect from noise. However, the  
71 main requirement when handling with pediatric dMRI data is the choice of a proper acquisition  
72 protocol tailored for pediatric imaging, made up of low angular resolution, low b-values and few  
73 gradient directions, likewise in pediatric brain (18) in order to minimize scan time. Nevertheless,  
74 this forced time minimization clashes with specific requirements of advanced diffusion methods in  
75 terms of acquisition sequences.

76 Indeed, contrary to DTI, DKI and higher-order diffusion models requires multi-shell high angular  
77 resolution diffusion imaging (HARDI) sequences (19), typically involving at least three non-zero b-  
78 values distributed on hundreds of gradient directions, grouped in shells. This implies longer  
79 acquisition time, straining the feasibility of advanced dMRI methods in pediatrics. Resorting to  
80 optimized acquisition sequences (20), often combined with state-of-the-art techniques such as  
81 Parallel Imaging (21) and Multi-Band, can significantly increase acquisition speed and reduce  
82 artifacts. However, these advanced technologies are not always available in a general hospital due  
83 to high costs and technical limitations.

84 If extension of DTI to the pediatric SC has shown promising results in a wide range of clinical  
85 conditions, as evidenced by the increasing number of works on the topic (22–31), what immediately  
86 stands out while reviewing literature on pediatric SC is the absence of studies concerning DKI and  
87 particularly applied to the neonatal period (0-1 month).

88 To the best of our knowledge, the only published work on pediatric DKI (32) is limited to grown-up  
89 children (6-16 years), whose larger anatomical structures and reduced source of movements enable  
90 better image quality and longer scan times. Indeed, in newborns, SC dimensions themselves - 24 cm  
91 average length and 4.4 mm diameter, which can further decrease in case of malformations (33)- are  
92 enough to conceive amplification of aforementioned technical issues and thus justify the lack of  
93 research towards this direction.

94 However, the ability of DKI to offer additional and complementary information to DTI may bring a  
95 significant contribution in investigating such decisive and delicate stage of development, especially  
96 if we consider the wide range of developmental anomalies of the spinal canal affecting infants at  
97 birth (34–37).

98 It is on this premise that we conceived our work, whose aim is to show the feasibility of applying  
99 DKI to neonatal SC within clinical routine with all the issues that this entails.

100 We thus introduce here the first complete pipeline specifically adapted to neonatal imaging acquired  
101 for diagnostic purposes. Applicability and clinical validity of proposed method has been evaluated  
102 analyzing a specific clinical case-study concerning a condition common to preterm birth, in  
103 collaboration with Neuroradiology Unit of Giannina Gaslini Children's Hospital of Genova.

104 Specifically, we assessed effects of WM brain lesions typical of Periventricular White Matter Injury  
105 (PWMI) on below cervical SC tracts by comparing diffusion measures between pathological  
106 patients and healthy controls. Our findings, though preliminary, confirm ability of DKI model in  
107 capturing subtle pathological alterations.

108 Since there are currently neither available protocols nor standardized methodological pipelines for  
109 performing DKI in the infant SC, this methodological outline may at least serve as a proof-of-  
110 concept, stressing the need for infant-specific data acquisition and processing guidelines in order to  
111 translate DKI of neonatal SC into routine clinical practice.

112

## 113 2. Materials and Methods

### 114 2.1 Subjects

115 Infants whose data have been used to disclose each step of the pipeline have been enrolled since  
116 August 2019 and scanned with 3.0 T MR scanner using a 32-channel head array coil (Ingenia Cx,  
117 Philips, Best, the Netherlands) at the Neuroradiology Unit of Giannina Gaslini Children's Hospital  
118 of Genova. Conventional MRI and DKI were performed in 17 pre-term infants (28.1 to 36.7 weeks

119 Gestational Age (GA); scanned at Term-Equivalent Age (TEA)). Details about subjects'  
120 demographics are reported in Table 1.

121 This single-center study was carried out in accordance with the recommendations of “Comitato  
122 Etico Regione Liguria, Genova, Italy” with written informed parental consent obtained for each  
123 infant prior to examination in accordance with the Declaration of Helsinki. Subjects were  
124 spontaneously breathing during examination; free-flowing oxygen was administered for all the  
125 duration of MRI session if necessary. Throughout the course of the examination, newborns were  
126 subjected to constant monitoring of the oxygen saturation and heart rate, by pulse oximeter and  
127 three-electrode electrocardiographic monitoring, respectively.

128 Exclusion criteria included obvious motion artifacts, oblique positioning, an incomplete imaging  
129 process or a low SNR. We opted for focusing exclusively on upper SC portion, by only acquiring  
130 the cervical district (C1-C7), affected by a significantly lower degree of physiologic motion than the  
131 dorsal and lumbar portions (38).

132 In consensus with a board-certified pediatric neuroradiologist, we performed QC for each of the  
133 pipeline’s steps.

134

135

|                               | <b>Unhealthy (n=9)</b> | <b>Healthy (n=8)</b> |
|-------------------------------|------------------------|----------------------|
| <b>Gender (M/F)</b>           | 6/3                    | 4/4                  |
| <b>Mean GA (range; week)</b>  | 30.3±2.6 (28.1-35.0)   | 31.8±3.1 (28.3-36.7) |
| <b>Mean PNA (range; week)</b> | 9.2±3.9 (0.1-11.7)     | 8.6±3.6 (2.0-10.7)   |
| <b>Mean PMA (range; week)</b> | 39.4±1.6 (35.1-40.6)   | 40.4±1.3 (38.7-42.4) |

M/F = number of male and female infants; GA = gestational age; PNA= postnatal age;  
PMA = postmenstrual age.

136

**Table 1: Demographics features of infants**

137

138 2.2. Full pipeline description

139 Our pipeline integrates MRtrix3 (v.3.0.1) (39) for setting of dMRI acquisition sequence, Spinal  
140 Cord Toolbox (SCT, v. 5.3.0, <https://github.com/neuropoly/spinalcordtoolbox>) (40) for all  
141 processing steps specific to the SC, and Diffusion Imaging in Python (Dipy, v.1.4.0) (41) for  
142 denoising as well as computation of diffusion metrics.

143 Output of key processes, such as motion correction, segmentation and registration with atlas, can be  
144 checked through an interactive SCT Quality Control (QC) module, which automatically generates  
145 reports consisting in HTML files, containing a table of entries and allowing to show, for each entry,  
146 animated images (background with overlay on and off) for data quality validation.

147 In our methodological pipeline we have opted for mainly relying on SCT, being currently the only  
148 existing fully-comprehensive, free and open-source software dedicated to the processing and  
149 analysis of multi-parametric MRI of the spinal cord (42–53) successfully employed in a plethora of  
150 clinical applications concerning adult SC (54–63).

151 An overview of our image processing pipeline highlighting key features is shown in Figure 1. Since  
152 SCT algorithms are validated in adult imaging, we specifically customized each processing step to  
153 our neonatal scans. Our pipeline thus represents, to the best of our knowledge, the first semi-  
154 automated ad-hoc procedure for imaging of neonatal spine. A fully automatic workflow is not  
155 feasible here: acquisition time constraints, available scanner features, and subsequent image quality  
156 require inevitable although minimal and highly reproducible manual interventions.

157

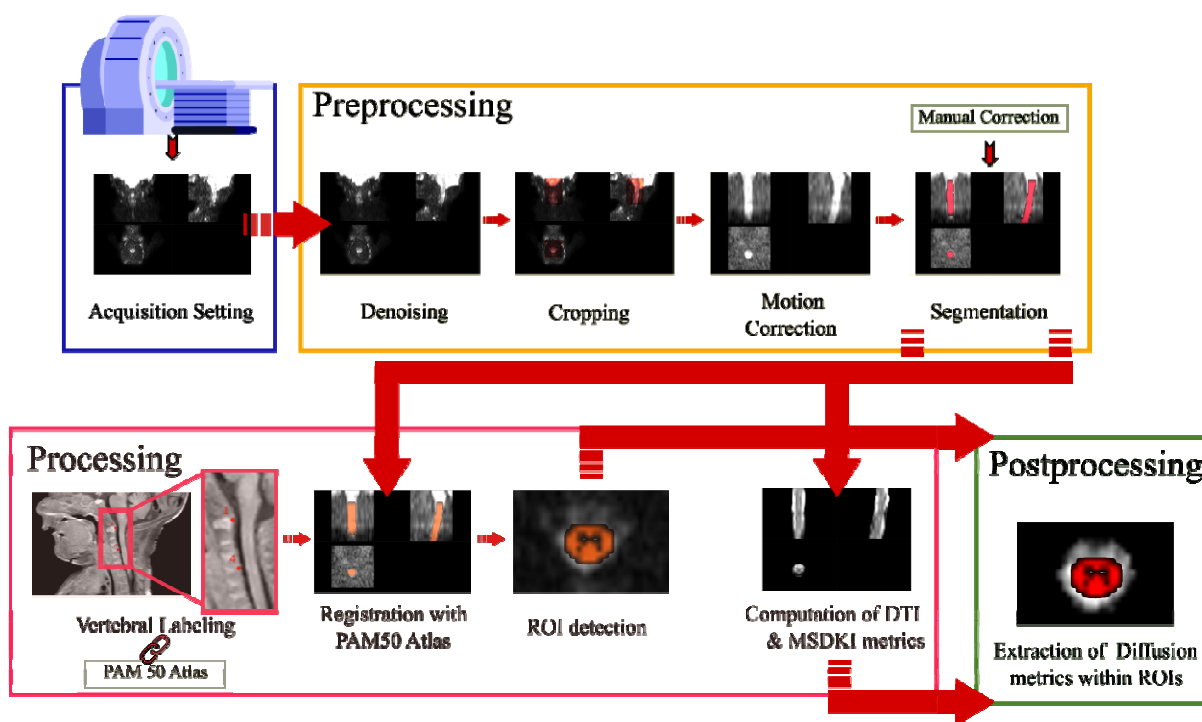

158

159

160 **Figure 1. Overall Processing Pipeline:** designed pipeline allows complete handling of DKI scan of

161 neonatal Spinal Cord from acquisition setup to preprocessing, processing and postprocessing

### 162 2.3. Customized acquisition setting

163 In order to minimize macroscopic movement artifacts, all recommended guidelines for pediatric  
164 imaging have been adopted. So as to protect infants from acoustic disturbances caused by MR  
165 sequences, we resorted to baby earmuffs and silicone paste for hearing aids. Furthermore, we  
166 avoided most of motion by swaddling infants and by placing airbags around the baby's head. In  
167 addition, protective pads have been placed between the magnet and the patient. All these contribute  
168 to create a comfortable and warm rest environment, minimizing the chance of free movements.

169 MRI was performed when possible during spontaneous sleep by exploiting the administration of  
170 breast milk or formula about 30 minutes before the start of the exam. In case of spontaneous sleep  
171 failure, in order to minimize macroscopic movement artifacts, the instrumental examination was  
172 performed under mild sedation by orally administering Midazolam at 0.1-0.2 mg/kg diluted in  
173 glucose solution 33%, subject to signature of informed consent from parents and applied by expert  
174 trained nurses.

175 Given the lack of a specific acquisition protocol for DKI of neonatal SC, we designed the diffusion-  
176 weighting scheme in collaboration with the neuroradiologists at Giannina Gaslini Hospital. One  
177 constraint we had to deal with was the impossibility to perform optimized variants of Spin-Echo  
178 Echo Planar Imaging (SE-EPI) sequence (i.e. reduced FOV or spatially selective techniques) (20)  
179 on Philips Ingenia scanner. Therefore, minimization of scan duration was our main focus in order to  
180 suppress motion and fast CSF pulsation artifacts typical of newborns.

181 We thus tested different versions of diffusion-weighted gradient scheme, adopting optimal trade-off  
182 between Fiber Orientation Distributions profile (FODs, estimated with Mrtrix3 using Multi-Shell  
183 Multi-Tissue Constrained Spherical Deconvolution (MS-MT CSD)), image quality and scan time.

184 We generated each multi-shell diffusion gradient table through Mrtrix3 script *gen\_scheme*, taking  
185 as inputs the number of phase-encoding directions to be included in the scheme (for most scanners,  
186 including ours, typically 1), the b-value of the shell, and the number of directions to include in the  
187 shell. This procedure ensures uniform sampling by maximizing uniformity within shells using a  
188 bipolar electrostatic repulsion model for optimal angular coverage.

189 For further reducing acquisition time without significantly affecting image quality, we applied the  
190 MultiBand slice acceleration technique (64) ([https://www.usa.philips.com/healthcare/resources/  
191 landing/compressed-sensecombined](https://www.usa.philips.com/healthcare/resources/landing/compressed-sensecombined)).

192 Moreover, spatial saturation bands have been used to suppress strong signals originating from the  
193 subcutaneous lipids to enable volumetric region coverage.

194 The final version of diffusion acquisition scheme is displayed in Figure 2 as well as reported in  
195 Table 2, and includes 6 b=0; 13 b=700 and 13 b=2100 s/mm<sup>2</sup> for a duration of 4 minutes 30  
196 seconds. This allowed acquisition of high in-plane resolution axial diffusion weighted images,  
197 where b=0 scans could be well discriminated from non b=0 volumes and anatomical SC features are  
198 sharp.

199 This is the best possible solution that combines conflicting requirements of complex multi-shell  
200 acquisition and minimized scan time.

201

202



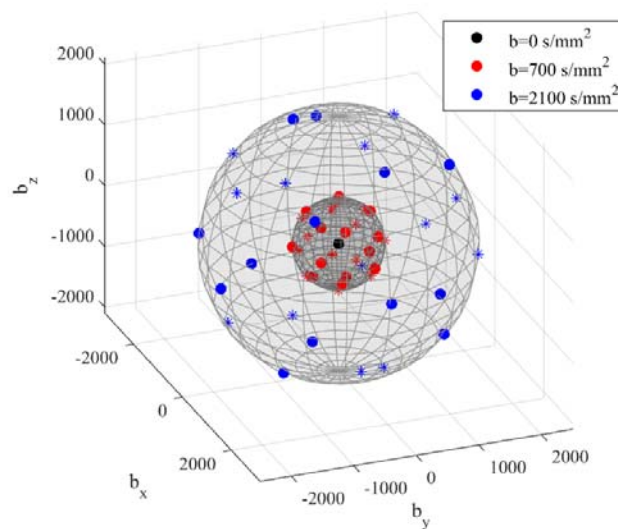

203

204

205 **Figure 2. 3D view of final diffusion acquisition scheme:** directions of diffusion-sensitizing  
 206 gradients relative to each b-value are displayed in three different colors as reported in the legend.

207 Units are in  $\text{s}/\text{mm}^2$ . Markers indicates polarity: dots are the polarities in the set, asterisks their  
 208 opposite

209 Along with dMRI, we also acquired a high-resolution structural image as anatomical reference. The  
 210 definitive MRI protocol thus consisted in a Turbo Spin Echo (TSE) 3D T1-weighted image  
 211 followed by a DKI series whose details are listed in Table 1.

|                                                             | <b>3dT1</b>      | <b>DKI</b>                         |
|-------------------------------------------------------------|------------------|------------------------------------|
| <b>TR/TE (s)</b>                                            | 0.6/0.026337     | 3.378/0.128                        |
| <b>Diffusion Scheme (<math>\text{s}/\text{mm}^2</math>)</b> | –                | 6 $b=0$ , 13 $b=700$ , 13 $b=2100$ |
| <b>Flip Angle (<math>^\circ</math>)</b>                     | 90               | 90                                 |
| <b>Acquisition Matrix</b>                                   | 251*512          | 160*160                            |
| <b>Multi-Band Factor</b>                                    | –                | 2                                  |
| <b>Acquisition Resolution (mm)</b>                          | 0.50*0.38*0.38   | 0.8*0.8*4                          |
| <b>Slice Thickness (mm)</b>                                 | 0.38, 0.5 mm gap | 4, without gap                     |
| <b>Slice Orientation</b>                                    | –                | axial                              |
| <b># Slices</b>                                             | 512              | 24                                 |
| <b>Field of View (FOV) (mm)</b>                             | 195x195x126      | 128x93x96                          |
| <b>Total Scan Time</b>                                      | 4 minutes 5 s    | 4 minutes 30 s                     |

212 **Table 2: Data Acquisition Details** for both structural 3D T1 and DKI image

## 213 2.4. Preprocessing

### 214 2.4.1. Denoising

215 SC imaging is characterized by low SNR, which can hamper accurate, repeatable, quantitative  
216 measurements. Moreover, models such as DKI are susceptible to noise and signal fluctuations often  
217 leading to degeneracies in estimation of derived parameters. SNR further lowers in case of  
218 neonates, due to relatively high overall free water content, and denoising approaches based on  
219 Principal Component Analysis (PCA) are inapplicable due to a reduced number of diffusion  
220 gradient directions.

221 Therefore, we adopted Patch2Self, a recently proposed self-supervised learning denoising method  
222 that outperforms existing non supervised methods. (65).

223 A unique advantage of Patch2Self is the lack of requirement for selecting or calibrating an explicit  
224 model either for noise or diffusion signal, so that it can be applied at any step in the pre-processing  
225 pipeline. The only assumption it relies on is randomness and uncorrelation of noise across different  
226 gradient directions. Its framework consists in holding out one volume and using patches from all  
227 other volumes to predict the center of the patches of the held-out volume using a regressor.  
228 This denoiser has already showed a significant improvement in repeatability and conspicuity of  
229 pathology in diffusion volumes and quantitative DTI metrics for adult SC (66).

230 Here, we chose to apply Patch2Self as first preprocessing step on raw data since it showed to offer  
231 highest SNR. The method is implemented in Dipy v.1.4.0 and applied with Ordinary Least Squares  
232 (OLS) regressor, since recommended for SC imaging (Figure 3).

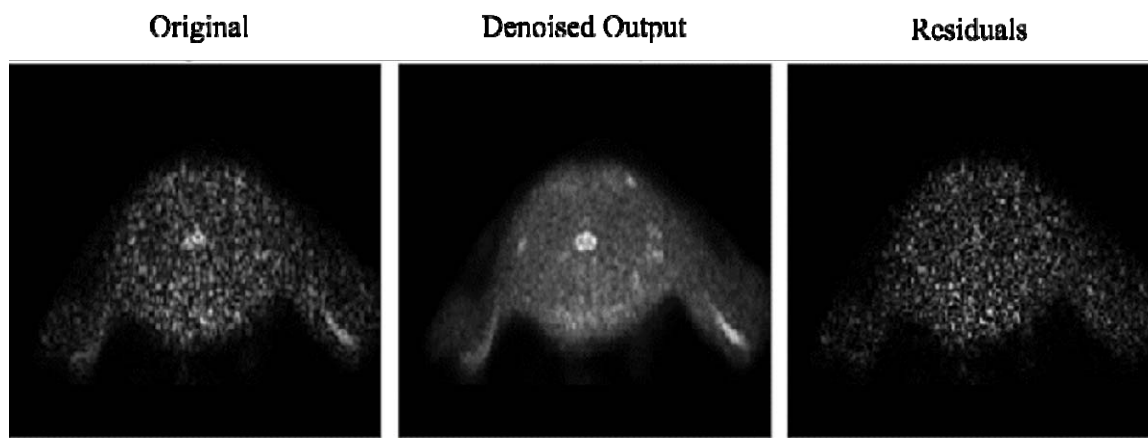

233 **Figure 3. Visual inspection of denoising:** The denoising of Patch2Self is compared against the  
234

235 original noisy image along with their corresponding residuals. Notice that Patch2Self does not show  
236 any anatomical structure in the corresponding residual plots likely neither introducing structural  
237 artifacts

## 238 2.4.2. Cropping

239 SC scans usually include also cerebral areas such as medulla and cerebellum due to their proximity  
240 with cervical SC. In order to exclusively focus on the area of interest excluding undesired voxels,  
241 as a first preprocessing step, we thus recommend to apply to DKI images SCT function  
242 *sct\_crop\_image* allowing also to fasten subsequent processing. Lower and higher bounds for  
243 cropping along the three spatial coordinates can be specified via command line in order to select the  
244 same area of interest (i.e. cSC) for all the cohort, considering FOV positioning is consistent across  
245 subjects.

246 Specifically, in the case of our scans, FOV reduction allowed to exclude upper non-spinal areas (i.e.  
247 cerebellum) as well as lower spinal levels whose corresponding slices are not usable due to poor  
248 image quality (Figure 4a).

249

## 250 2.4.3. Motion Correction

251 Subjects' immobilization and anesthesia successfully minimized motion in our acquisitions.  
252 However, since dMRI data are analyzed at a voxel level, residual intrascan and/or interslice motion  
253 can adversely affect accuracy of the modeled results. We thus resorted to SCT complex motion  
254 correction framework *sct\_dmri\_moco*, based on a combination of tools.

255 First of all, *SliceReg* algorithm estimates slice-by-slice translations while ensuring regularization  
256 constraints along z axis. The latter is achieved using a polynomial function (order specified by the  
257 user, flag *-param*). This method was shown to offer better accuracy and robustness than rigid-body  
258 transformations and non-regularized slice-by-slice registration, respectively (40).

259 Moreover, motion correction in SCT includes another feature first proposed in (67) to improve the  
260 robustness of registration in high b-value diffusion MRI data such as DKI datasets. It consists in  
261 grouping adjacent volumes and estimating the transformation relying on these successive subsets  
262 (typically from 3 to 5 volumes) averaged together (flag *-g*).

263 This robust slice- and group- wise motion correction works successfully also in case of neonatal  
264 scans and it is hence applied here with default parameters: grouping of 3 successive dMRI volumes,

265 regularization with 2<sup>nd</sup> order polynomial function, unitary smoothing kernel (1 mm), and final  
266 spline interpolation (flag -x), with the exception of the metric used for registration (Figure 4b).  
267 Indeed, Cross Correlation (CC) has been selected as similarity metric given its better performance  
268 with respect to Mean Squares or Mutual Information (default option) at the expense of  
269 computational time.

270 Since *sct\_dmri\_moco* works through iterative average over groups of successive slices in order to  
271 increase the SNR of the target image, its output includes a 3D volume corresponding to the mean  
272 from DKI slices. These motion-corrected average DKI data will serve as input for subsequent  
273 segmentation thanks to its excellent cord contrast.

274 Thanks to the limited duration of our acquisition and to adopted procedures for minimizing  
275 movement throughout the exam, amount of motion is very limited in our images. As a result,  
276 outcome of motion correction step does not significantly differ from raw DKI image by visual  
277 assessment. However, this represents a crucial step in case of longer scans more prone to source of  
278 motion artefacts.

279

#### 280 2.4.4. Segmentation

281 Proper segmentation of SC is decisive for subsequent steps of template registration and computation  
282 of metrics along the cord.

283 Detection of SC has turned out to be a critical step, since standard SCT algorithm *propseg*, based on  
284 multi-resolution propagation of tubular deformable models (68), is trained for adult spine.

285 Given the reduced size of neonatal SC and the low contrast between the spine and CSF, default  
286 segmentation method fails in several slices even after modulating the algorithm parameters - e.g.  
287 manual initialization of spinal cord centerline through interactive viewer (flag *-init-mask*), selection  
288 of SC radius size (flag *-radius*) or cord rescale (flag *-rescale*).

289 We thus resort to a more recent and advanced method of SC extraction, based on deep learning  
290 *sct\_deepseg\_sc* (69). This fully automatic segmentation framework was conceived for detecting SC  
291 and intramedullary MS lesions from a variety of MRI contrasts and resolutions.

292 It is composed of a cascade of two convolutional neural networks (CNN), specifically designed to  
293 deal with spinal cord morphometry: the first detects the cord centerline and reduces the space  
294 around the spinal cord (for better class balance), and the second segments the cord.

295 Segmentation results outperformed *sct\_propseg*, showing higher robustness to variability in both  
296 image parameters and clinical conditions.

297 Thanks to its versatility, the application of this method results suitable also for neonatal imaging,  
298 allowing robust and accurate segmentation of our scans without ever the need of additional  
299 parameters but just specifying the kind of image contrast as *dwi* (flag *-c*) (Figure 4c).

300 In case of failure of SC detection, we necessarily opt for manual correction of problematic slices on  
301 FSL editor (*FSLeyes*) (Figure 4d,e).

302 This is the case of five subjects within our cohort: to validate the quality of segmentation, we  
303 checked the QC feature on our MRI images across subjects and noticed some local segmentation  
304 leakage - (related to the onset of artifacts at acquisition phase and not to a flaw with the algorithm) -  
305 in a few slices and hence corrected it manually.

306  
307

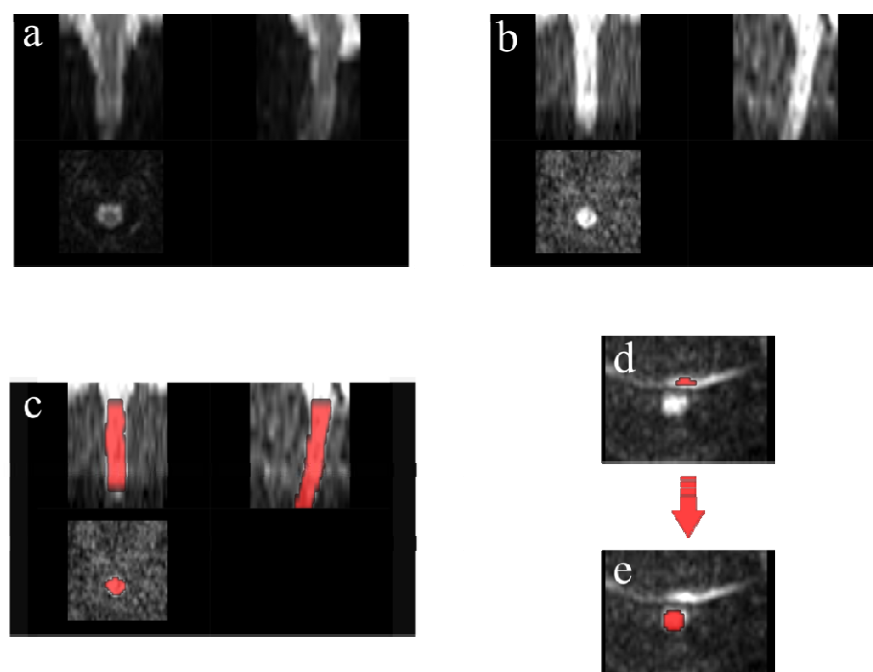

308

309 **Figure 4. Preprocessing:** DKI scan through preprocessing steps for one example subject: (a) FOV  
310 reduction; (b) Motion Correction; (c) Segmentation: Deep Learning Segmentation algorithm  
311 generally achieves satisfactory results in SC detection; (d) Example of artefactual slice due to a  
312 poor fat saturation, causing the fat to alias on the spinal cord area and (e) requiring manual  
313 correction of segmentation

## 314 2.5. Processing

### 315 2.5.1. Vertebral Labeling

316 After segmentation, labeling of vertebral levels or discs is the second mandatory step in order to  
317 match the template to the subject's MRI (template registration).

318 Two vertebral levels are necessary for registering data to the template. Each of these two landmarks  
319 consists of a voxel placed in the middle of the SC, at the level of the corresponding mid-vertebral  
320 body, and assigned a relative number starting from 1 for C1 vertebra. However, SCT recently  
321 introduced the possibility to alternatively use inter-vertebral disc labels with the analogous  
322 procedure of reference numbered voxels.

323 We perform this step on 3D T1w images in order to achieve better accuracy given their higher  
324 overall quality and contrast compared to DKI ones, where vertebral discs are not clearly  
325 identifiable.

326 Labeling from 3D T1w anatomical image is possible as it turned out to match relatively well along  
327 the superior-inferior (z) axis, the target direction of disc labeling, with the DKI scan (not along the  
328 Anterior-Posterior (AP) or Right-Left (RL) direction, Figure 5).

329 Vertebral labeling is typically done using an automatic method *sct\_label\_vertebrae*, that finds C2-  
330 C3 disc, and then locates neighbouring discs using similarity measure with the PAM50 template at  
331 each specific level (70).

332 Default SCT procedure *sct\_label\_vertebrae* fails in automatically detecting C2-C3 vertebral disc  
333 once again because of the small size of spines at issue and low image contrast compared to adults.

334 Therefore, we manually create labels with the command *sct\_label\_utils* through interactive viewer  
335 option provided by SCT (flag *-create-viewer*) with little to no waste of time.

336 Specifically, vertebral labeling was created at the posterior tip of the top of C1 vertebra and at C3-  
337 C4 disc, centered in the cord. Manual intervention only took a few seconds per subject (Figure 3S).

338  
339

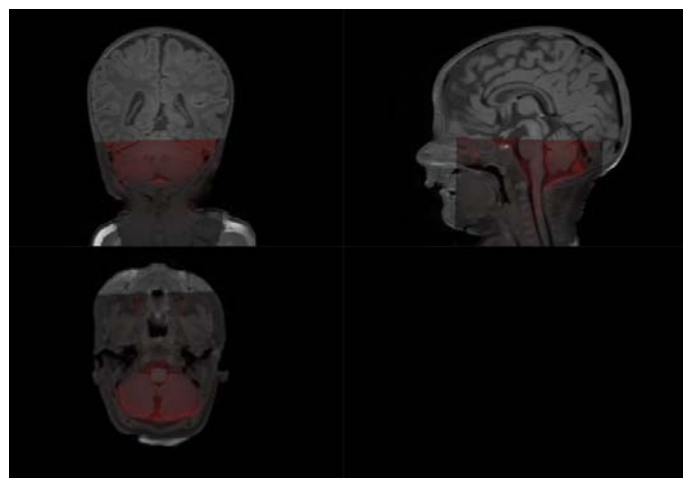

340

341

342 **Figure 5. DKI scan overlaid on structural 3dT1w image:** while both images are clearly not  
343 registered along the antero-posterior direction due to the very strong susceptibility artefact, the z-  
344 location is similar: see how the bottom tip of the cerebellum is consistent for the two scans

#### 345 2.5.2. Registration to PAM50 atlas

346 Registration between subject's diffusion and atlas space is a very demanding task in case of  
347 neonatal imaging given the lack of a specific pediatric atlas compatible with SCT (one is currently  
348 under creation, <https://github.com/neuropoly/spinalcordtoolbox/issues/2530>). We thus use PAM50  
349 atlas (71), an adult template for MRI of the full SC and brainstem in the same coordinate system as  
350 the ICBM152 (MNI) brain template, allowing to conduct simultaneous brain/spine studies. It  
351 consists of a T1w, T2w, T2\*w, white and gray matter probabilistic atlas and white matter atlas of  
352 tracts as well as probabilistic labeling of spinal levels. The template has been constructed from  
353 straightened SC for facilitating registration and visualization of results.

354 *sct\_register\_to\_template* is the main command for registering one subject to the template and vice  
355 versa, since it outputs the forward and backward warping fields. We choose subject's native  
356 diffusion space as target of registration transforms since the straightening required by opposite  
357 strategy would cause through-plane interpolation errors which would bias following extraction of  
358 diffusion measures (72).

359 Moreover, we suggest employing T1w atlas image for its better contrast similarity with DKI scan  
360 compared to T2w.

361 Application of default command does not produce satisfactory results, stressing the need to tweak  
362 all input parameters to deal with our particular contrast and resolution. Given the presence of

363 artifacts and some inherent features (e.g., low CSF/cord contrast) that could compromise the  
364 registration, we use SC segmentation as input for the algorithm in order to ensure maximum  
365 robustness.

366 Registration is then built through multiple steps by increasing the complexity of the transformation  
367 performed in each step (starting with large deformation with low degree of freedom and finishing  
368 with local adjustment). Specifically, the first step consists in vertebral alignment, that is vertebral  
369 level matching between the subject and the template on the basis of posterior edge of the  
370 intervertebral discs provided by previous manual vertebral labeling. Second step is slice-wise center  
371 of mass alignment between the two images, using *centermass* algorithm instead of default  
372 *centermassrot* (which also includes rotation alignment) because the cord is quasi-circular and cord  
373 angle estimation is not reliable here. The third step is R-L scaling along x axis followed by A-P  
374 alignment to match segmentation borders along y axis, with the ultimate aim of accommodating the  
375 very small SC size. Finally, iterative slice-wise non-linear registration is performed through non-  
376 linear symmetric normalization regularized with b-splines (73) using information from comparison  
377 of Cross Correlation metric (CC) between the two images, which allows SC shape refinement. Once  
378 the algorithm completed, one can assess the quality of registration through visual evaluation and  
379 inspection of QC module, and thus warp the template and all its objects to each subject's DKI  
380 image (Figure 6).

381 Current selection of parameters and steps successfully worked for our scans since atlas registration  
382 algorithm robustly achieved convergence as verified through inspection of QC feature.

383

384



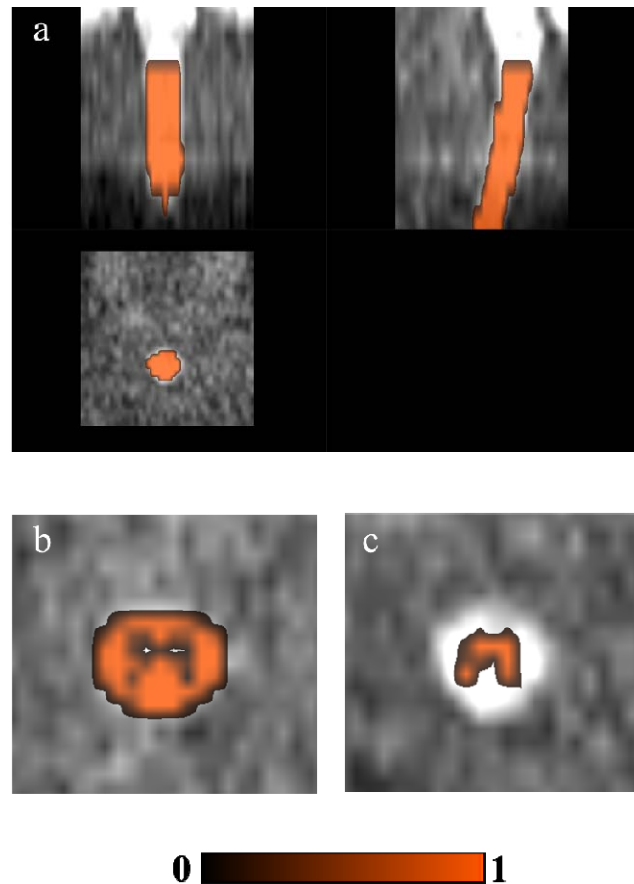

385

386 **Figure 6. Registration with PAM50 atlas and ROI detection through atlas-based approach:** (a)  
387 PAM50 atlas' cord segmentation binary mask, (b) WM and (c) GM probabilistic masks warped to  
388 subject's DKI motion-corrected mean image

### 389 2.5.3. Computation of diffusion metrics

390 The end point of previous preprocessing and processing steps is computation of diffusion  
391 parametric maps, from which to extract quantitative summary measures requested by the particular  
392 study in question. We estimate diffusion parametric maps through DIPY software (v. 1.4.0), (41)  
393 To avoid unnecessary calculations on the background of the image, we use a mask created by  
394 dilating spinal cord segmentation (through *sct\_maths* command) because values outside the binary  
395 cord mask are important for proper account of PVE, having to be minimized in every possible way  
396 (74). Indeed, this phenomenon, because of the coarse resolution of MRI with respect to SC  
397 anatomy, may make the apparent value within a boundary voxel be a mixture between the WM and  
398 CSF compartment, thus yielding a subsequent inaccurate quantification of diffusion measures.

399 Since DKI model involves the estimation of a large number of parameters (75) and is more sensitive  
400 to artefacts (76), we choose to further suppress the effects of noise and artefacts before diffusion  
401 kurtosis fitting using a 3D Gaussian smoothing (with a Gaussian kernel with fwhm=1.25) as  
402 suggested by pioneer DKI studies (2). This also helps in addressing the issue of implausible  
403 negative values inherent to DKI fitting (77).

404 The following parametric maps can thus be generated: Mean Diffusivity (MD), Axial Diffusivity  
405 (AD), Radial Diffusivity (RD), Fractional Anisotropy (FA) and Mean Kurtosis (MK), Axial  
406 Kurtosis (AK), Radial Kurtosis (RK), Kurtosis Fractional Anisotropy (KFA), and Mean Signal  
407 Kurtosis (MSK).

408 Given the low-angular resolution data available, to ensure robustness and reproducibility of  
409 parameters' estimates, we opted for just computing DTI measures, whose reference tensor can be  
410 correctly estimated from at least six independent directions, and MSK, as displayed in Figure 1S.  
411 The latter is a robust scalar kurtosis index that can be estimated from powder averaged diffusion-  
412 weighted data and thus independent from acquisition scheme (78,79). Indeed, fitting MSDKI is well  
413 posed without relying on the full DK tensor, which would require a minimum of 15 non-collinear  
414 directions per b-value. Moreover, this measure is generally more robust to low SNR situations as in  
415 case of neonatal imaging.

416 This novel DKI estimator can be seen as a proxy for the MK, showing to present nearly identical  
417 contrast to the original DK metric while improving robustness and reproducibility of the kurtosis  
418 metrics and results in parameter maps with enhanced quality and contrast. Specifically, this measure  
419 turns out to be less sensitive to thermal noise and imaging artifacts, and thus drastically reduces  
420 black voxels intrinsic to DKI and challenging the visual and statistical analysis of potentially  
421 clinically relevant biomarkers of tissue integrity. Moreover, as previously pointed (80), standard  
422 kurtosis measures do not only depend on microstructural properties but also on mesoscopic  
423 properties such as fiber dispersion or the intersection angle of crossing fibers. In contrary, the  
424 kurtosis from powder-average signals has the advantage of being decoupled from confounding  
425 effects of tissue dispersion and crossing (80,81).

426

## 427 2.6 Postprocessing

428 Thanks to this atlas-based analysis approach, it is possible to perform cord-specific quantification of  
429 diffusion metrics through `sct_extract_metric` command, also restricted to specific Regions of

430 Interest (ROIs; labels used by default are taken from the PAM50 template, e.g. WM tracts, flag *-l*),  
431 vertebral levels (flag *-vert*) or slice (flag *-z*), according to the specific clinical needs concerned.  
432 Along with WM and GM probabilistic masks as a whole (Figure 6b,c), normally investigated in  
433 medical practice, one can carry out ROI detection also in specific tracts according to the clinical  
434 question (fifteen WM tracts and three GM regions available in total for each side).  
435 In our example, neither DKI nor structural images ensured sufficient WM-GM-CSF contrast to  
436 perform any manual detection of ROIs in contrast to high-contrast PSIR image of (82), whose  
437 acquisition time would be too long for neonates. Therefore, we exploited good registration outcome  
438 for automatic delineation of ROIs through atlas-based approach.  
439 We opted for using lateral CSTs as ROIs for consistency with (82) - though grouping together left  
440 and right sides in order to gain robustness by increasing volume fraction as suggested in (40) - as  
441 well as WM and GM.  
442 We then computed averages of diffusion measures across C1-C4 vertebral levels in order to avoid a  
443 subject-based bias: outside of these levels the registration is inaccurate and/or MRI signal may be  
444 corrupted. We thus checked through QC module the correctly segmented slices corresponded to the  
445 same vertebral levels across subjects, starting from the first slice containing only SC (excluding  
446 cerebellum, Figure 2Sc).  
447 Moreover, estimation of DTI and MSDKI weighted average metrics was limited to those slices  
448 where spinal cord segmentation is accurate: outside segmentation mask, metrics would indeed be  
449 irrelevant. This was obtained by multiplying segmentation mask by specific WM, GM and CSTs  
450 atlas labels. We quantified diffusion metrics using Weighted Average (WA) estimation to minimize  
451 PVE avoiding bias into resulting metrics by the surrounding tissues (e.g. CSF). This is one of the  
452 recommended methods especially in case of noisy images and small tracts as in our case. We  
453 assessed associated voxel fraction to quantify the reliability of our diffusion measures: as  
454 demonstrated in (40), having at least 240 voxels results in an error smaller than 1%, while having  
455 30 voxels results in an error inferior than 2%. In this example, the metrics were computed based on  
456 average 178.3, 50.5 and 31.5 voxels in WM, GM and CSTs respectively, thus assuring sufficient  
457 accuracy of estimates.

458

## 459 2.7 Case Study

460 Periventricular WM Injury (PMWI) is the most frequent type of brain lesion in preterm infants, and  
461 the spatial extent and location of WM injury correlate with distinct clinical outcomes, including  
462 cerebral palsy and motor impairment (83).

463 Given the strong association of WM injury with the motor function development of preterm  
464 neonates, we assessed the hypothesis that the presence of periventricular punctate WM lesions  
465 identified on MRI at TEA could be associated with regionally specific alterations in cSC  
466 microstructure.

467 A similar approach was already used by (82) to characterize cSC microstructural abnormalities in a  
468 cohort of adult patients with previous unilateral ischemic stroke in the vascular territory of the  
469 middle cerebral artery (MCA). DTI and DKI diffusion measures in cSC resulted to be a valuable  
470 imaging marker for predicting clinical outcome. In particular, significant reduction of FA and MK  
471 was observed in the affected lateral WM bundle of the cSC, correlating with the severity of motor  
472 dysfunction.

473 Accordingly, the ultimate goal of our study was to verify whether the presence of periventricular  
474 WM lesions affects the cSC tracts development. Specifically, we aimed to compare DTI and  
475 MSDKI measures of cSC in two groups of preterm neonates: (i) with punctate Periventricular White  
476 Matter lesions (PWMI), and (ii) with normal brain MRI (controls).

477

## 478 3. Results

### 479 3.1. Population size and classification

480 In order to investigate clinical differences among acquired subjects, we grouped infants as follows:  
481 i) 9 subjects with punctate PWMI and ii) 9 subjects with normal brain MRI, used as control group.

482 At QC phase, in accordance with the expert neuroradiologist, we opted for excluding one control  
483 subject due to excessively poor image quality (i.e. signal leakage at C1-C3 level, Figure 2Sa,b).

484 Therefore, the final number of subjects under analysis amounted to 9 and 8 infants for the two  
485 subsets, respectively.

486

### 487 3.2. The role of denoising

488 As mentioned above, neonatal imaging is inherently affected by low SNR and sensitive to imaging  
489 artifacts. Proper denoising of scans is therefore a crucial step in the processing pipeline. Above all,

490 we thus focused on quantitatively assessing the contribution of Patch2Self denoiser on subsequent  
491 analysis.

492 Firstly, we computed average SNR on  $b=0$  images, namely thermal noise due to the diffusion-  
493 related signal attenuation, across all slices belonging to C1-C4 district of our interest.

494 As expected, we found a remarkable increase in mean SNR after applying Patch2Self ( $5.88 \pm 1.41$   
495 vs  $14.64 \pm 4.53$ ) as displayed in Figure 7.

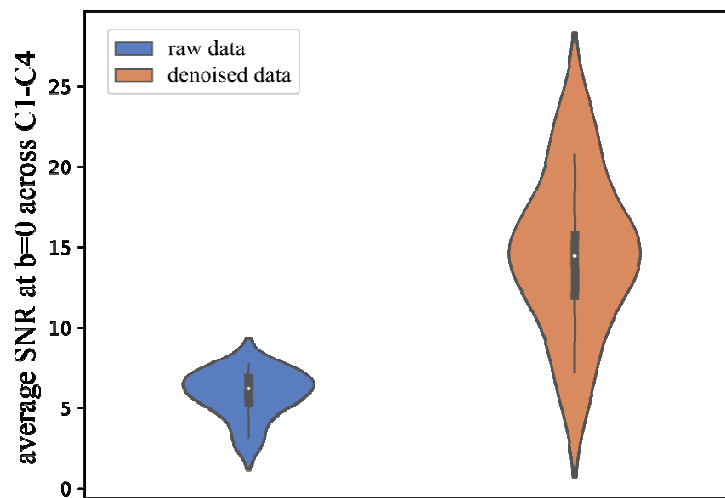

496

497 **Figure 7. Effects of Patch2Self denoising on thermal noise.** Average Signal-to-Noise Ratio  
498 (SNR) computed on  $b=0$  images increases, across C1-C4 vertebral levels under analysis, when  
499 including denoising with Patch2Self algorithm in the processing pipeline

500

501 We then inspected impact of denoising on microstructure model fitting, a critical step often leading  
502 to degenerate parameter estimates due to the low SNR of dMRI acquisitions.

503 Specifically, we applied DTI and MSDKI model on raw and denoised data, resorting both to  
504 traditional Marchenko-Pastur PCA (MP-PCA) and to Patch2Self method. We opted for comparing  
505 our denoising procedure with MP-PCA since it represents the current state-of-the-art unsupervised  
506 method for denoising DWI (84). In order to compare the goodness of each fit, we performed a k-  
507 fold cross-validation (85) across an axial slice (1312 voxels) of masked data for an example subject  
508 pulled out from our dataset. In Figure 8, we depict the improvement of the metric by simply  
509 subtracting the goodness-of-fit scores of fitting noisy data from Marchenko-Pastur and  
510 Patch2Self denoised data for both DTI and MSDKI models. Patch2Self performance is not  
511 significantly better than MP-PCA in the goodness-of-fit for DTI model (two-sided t-test with  
512 Bonferroni correction,  $p=1$ ). On the contrary, this state-of-the-art denoiser shows a significant

513 improvement for MSDKI ( $p=1.825e-04$ ), proving once more to be particularly suitable for DKI  
514 model.  
515

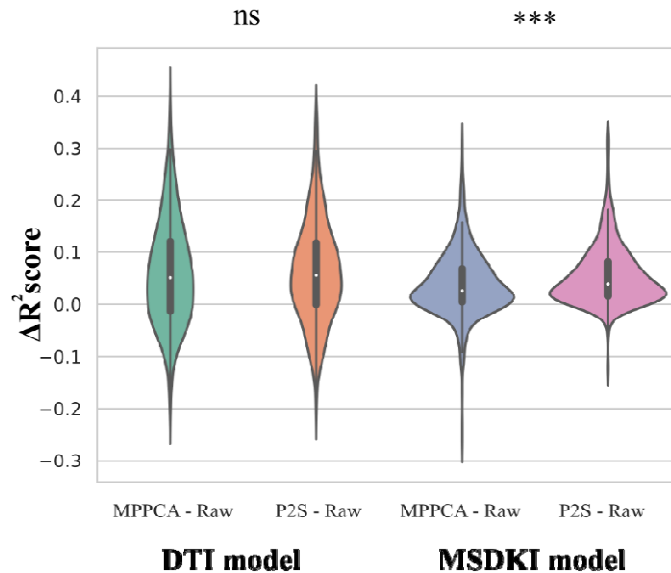

516  
517

518 **Figure 8. Violin plots quantifying the increase in  $\Delta R^2$  metric after fitting downstream DTI and**  
519 **MSDKI models for one axial slice in one example subject.** The improvements in each case  
520 are plotted by subtracting the scores of model fitting on noisy data (Raw) from the scores  
521 of fitting each denoised output. Note that the consistency of microstructure model fitting on Patch2Self (P2S)  
522 denoised data is higher than that obtained from Marchenko-Pastur (MPPCA), especially as regards  
523 the MSDKI model. ns stands for non significant, \*\*\* stands for  $1.00e-04 < p \leq 1.00e-03$   
524 in two-sided t-test with Bonferroni correction

525

### 526 3.3. Trend of diffusion measures

527 For consistency with (82), we considered above all trend of cSC FA and MSK measures in the two  
528 groups of neonates as displayed in Figure 9. For the sake of completeness, in Figure 4S we also  
529 include remaining DTI metrics.

530 To an initial evaluation based on the limited sample size available, considering the variation of  
531 average metrics between controls and patients in WM, we can notice an increase in MD, AD, RD,  
532 parallel to an overall decrease in FA and MSK in preterm neonates with PWMI.

533 Furthermore, range of values of DTI measures are consistent with normative values on healthy  
534 pediatric SC (30). MD, AD and RD values are higher while FA values are lower compared to  
535 equivalent measures on older cohorts of patients (i.e. children/ adolescents, (22,23,25,26)). This  
536 may be partially due to sensitivity of FA to denoising, which can imply a reduction in this metric.  
537 Moreover, this trend is in line with the simultaneous age-related decrease in MD, AD and RD and  
538 increase in FA metrics reflecting progressive maturation, myelination and fiber packing and  
539 thickening within the SC, similar to that observed in the brain (86,87).  
540 Conversely, definition of a normative variation of DKI measures across age from newborns to  
541 adults will be feasible after further investigations from early stages of development.  
542

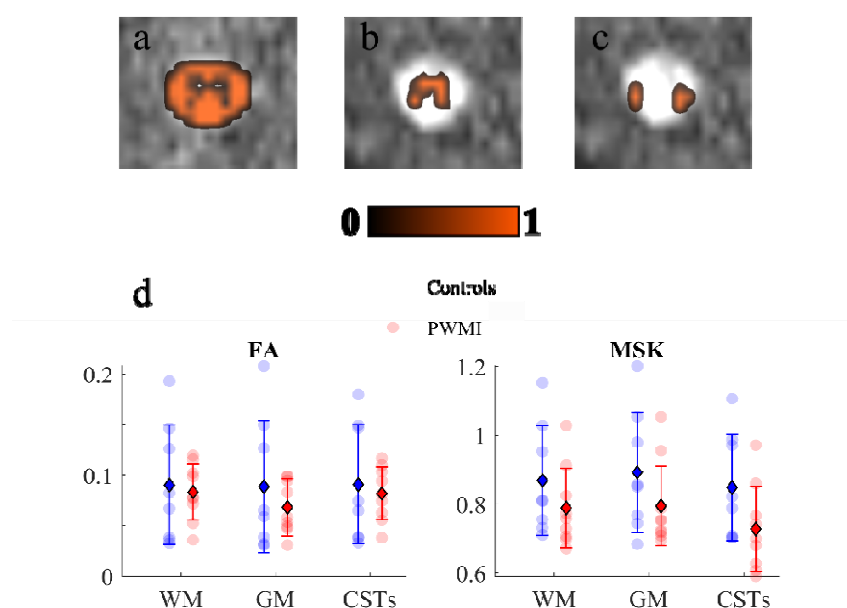

543  
544 **Figure 9. Extraction of diffusion measures within specific ROIs:** (a) White Matter (WM), (b)  
545 Gray Matter (GM) and (c) Cortico-Spinal Tracts (CSTs) ROIs overlaid on DKI motion corrected  
546 image; (d) Scatter plots of FA and MSK in group subjects across aforementioned ROIs: colored  
547 spots indicate single subject's value for each metric; as reported in the legend, controls' measures  
548 are in blue, whereas Periventricular White Matter Injury (PWMI) group's in red. Units for MSK are  
549 in mm<sup>2</sup>/s, while FA is dimensionless. Error bars displaying mean (diamond) and standard deviation  
550 (bars) are overlaid on scatter plots.

551

552

## 553 4. Discussion

## 554 4.1. Research question

555

556 In the present study we tested the pipeline of SC DKI analysis in a group of neonates with PWMI, a  
557 form of mild WM injury frequently diagnosed in preterm infants. PWMI are seen at brain MRI as  
558 small, focal, multiple alterations of signal intensity (high on T1 and/or low on T2) in periventricular  
559 WM. Long-term outcome of neonates with PWMI seems to be related to the number of lesions,  
560 their pattern, and their localization. Of note, several studies have showed that greater lesion load of  
561 PWM and the involvement of frontal WM are associated with higher risk of adverse  
562 neurodevelopmental outcome, affecting both motor and cognitive functions (88). Moreover,  
563 periventricular WM lesions in preterm neonates are associated with region-specific changes in MD,  
564 FA, RD, and AD in several cerebral WM tracts that might explain the abnormal development of  
565 long-term neurological functions (89). Specifically, the involvement of pyramidal tract fibers in the  
566 periventricular WM has been demonstrated to be a relevant factor for motor dysfunction in children  
567 with PWMI (90). In our study, we found that microstructural changes can be detected by using an  
568 advanced DKI analysis also in the GM and WM of cSC of preterm neonates with PWMI studied at  
569 term-equivalent age, thus demonstrating that DKI parameters could be used as markers to unravel  
570 underlying microstructural lesions not visible on conventional structural MRI. Moreover, our  
571 preliminary findings confirm the hypothesis that in preterm neonates with PWMI WM  
572 microstructure alterations extend beyond the immediate area of periventricular injury, widening  
573 distally also in the cSC (91,92). Further analyses on a wider cohort of neonates are necessary to  
574 confirm these preliminary results, and specifically to prove if microstructural changes in cSC in  
575 preterm neonates with PWMI correlate with long-term neurological outcome.

576

## 577 4.2. Study significance

578 Here, we present the first application of DKI to neonatal SC through a pipeline able to perform  
579 complete processing on a subject within a clinically acceptable time (10 minutes average with the  
580 current setup). As regards acquisition setting, we were able to perform a time-consuming technique  
581 like DKI using a short diffusion sequence which minimizes patient's physiological motion and  
582 which likely reflects a standard clinical scenario devoid of latest technologies in terms of  
583 acquisition sequence optimization. With regard to image processing, we opted for creating this  
584 pipeline using SCT since it represents the only existing comprehensive, free and open-source  
585 software dedicated to the processing and analysis of SC multi-parametric MRI data. Adaptation of



586 each image processing tools already in use for adult subjects through appropriate tuning of  
587 parameters turned out to be feasible. Indeed, it allowed to successfully overcome all the issues  
588 mentioned in the ‘Introduction’ section inherent to imaging of SC and exacerbated in case of  
589 neonatal setting, even for the most challenging steps like segmentation or registration to atlas. We  
590 were thus able to quantify diffusion measures within specific ROIs using an atlas-based approach  
591 which presents undisputed advantages compared to usual manual drawing of ROIs. It is automatic  
592 and thus highly reproducible, it is not biased by the user experience and knowledge of the anatomy,  
593 it is much faster than long and tedious manual delineation of ROIs and it allows to account for PVE.  
594 Preliminary application of our method to a limited number of subjects has yielded physiologically  
595 plausible findings despite suboptimal acquisition setting. In particular, differences in DTI and  
596 MSDKI measures observed between PWMI neonates and controls confirm the hypothesis that  
597 PWM injuries in the premature brain can be associated with microstructural alterations of both GM  
598 and WM of neonatal cSC at term-equivalent age. These findings also highlight the importance of  
599 complementary analysis of DTI and DKI metrics for a more accurate characterization of biological  
600 tissues.

601

### 602 4.3 Added value of DKI

603

604 Results about feasibility of DTI and MSDKI analysis in neonatal SC with subjects collected so far  
605 are preliminary but promising and demonstrate the clinical utility of combining DTI and DKI in the  
606 characterization of spinal cord pathologies.

607 FA reduction parallel to MD increase in patients is an expected finding consistent with existing  
608 literature and attributable to degeneration of diffusion barrier and loss of diffusion directionality.

609 Regarding DKI, it is interesting to note how MSK metric, although yet underused in clinical  
610 studies, proves to be more sensitive than FA to microstructural changes in PWMI subjects by  
611 further reducing its value in all considered ROIs.

612 This DKI estimator thus confirms DKI increased sensitivity in capturing alterations related to  
613 pathology, also far from the lesion site.

614 Another crucial food for thought concerns observing how the presence of a WM lesion in the brain  
615 causes subsequent alterations not only in cSC WM but also in GM, as evidence of the strong  
616 association between brain and spine. In this respect, resorting to DKI measures becomes of utmost  
617 importance given kurtosis sensitivity to structural changes in isotropic tissues such as GM.

618 Indeed, range of variation of MSDKI metric from controls to PWMI is overall higher in GM than  
619 that of corresponding DTI measures.

620 This is an expected finding: DTI is extremely suitable for capturing highly directional diffusion  
621 typical of WM bundles but shows low sensitivity to isotropic diffusion, whereas DKI allows  
622 specific assessment of non-gaussian diffusion typical of GM areas (93).

623 Such findings once again stress the importance of combining DTI and DKI metrics as  
624 complementary sensitive biomarkers in order to fully exploit the potential of dMRI compared to  
625 conventional MRI.

626 However, a more comprehensive corroboration and explanation of our results is expected after  
627 collecting an adequate number of subjects to carry out a robust statistical survey. An in-depth  
628 interpretation of the single metrics is out of the scope of this paper. Here, we just dwell on exploring  
629 the comparison with the work on adults which served as a starting point.

#### 630 4.4 Comparison with adult study

631

632 Since MSK has proved to be an exact approximation of MK, here we assimilate it with standard  
633 DKI metric used in (82).

634 Both FA and MSK trend agree with just mentioned study. Specifically, they both exhibit a  
635 reduction in WM, GM and CSTs in case of pathology (Figure 9).

636 Since FA is known to be an index of structural integrity (94) and MSK a marker of tissue  
637 microstructure complexity (2), obtained findings suggest that, in case of overlying WM brain lesion,  
638 a loss of integrity and complexity is registered also in SC WM tracts below with a more isotropic  
639 diffusion pattern due to disruption of WM tracts. Also MD, AD and RD follow the same trend, with  
640 an increase in case of lesioned subjects, as in (82). This biologically plausible hypothesis already  
641 verified for adults would thus also subsist in infants.

642

643

#### 644 4.5. Study limitations

645 Present pipeline has been designed with current instruments at disposal and with given data whose  
646 resolution is high in axial plane but whose contrast is very low due to short acquisition time. As a  
647 result, any improvement in acquisition setup our pipeline will bring to even stronger and more  
648 comprehensive results.

649 Major flaws of this procedure consist in basing on an adult atlas, where the exact location of tracts  
650 may not perfectly correspond to neonatal images despite the good adjustment of registration  
651 parameters. Current pipeline will definitely benefit from introduction of a pediatric atlas into SCT.  
652 Moreover, image quality could be further improved: scans we acquired are extracted from routine  
653 clinical protocol and consequently prone to noise and artifacts due to short acquisition time dictated  
654 by clinical needs and to the lack of specific spatially-selective MR sequences.  
655 Starting from more advanced hardware tools may significantly increase image quality and thus  
656 accuracy of estimated metrics. Resorting to optimized acquisition sequences would also allow to  
657 increase resolution of HARDI acquisition scheme and thus to exploit all standard DKI measures,  
658 which can in turn increase the amount of diagnostic information.  
659 We acknowledge the protocol in use to be on the edge for HARDI schemes required by DKI.  
660 However, this represents an attempt to customize advanced dMRI acquisition setting within a  
661 clinical routine protocol, already long in itself since made up of multiple MRI sequences in order to  
662 increase diagnostic possibilities. Nevertheless, we appropriately addressed this issue at DKI tensor  
663 and measures computation phase to ensure reliability and accuracy in their estimates.

664

#### 665 4.6. Future developments

666

667 Validation of current pipeline can be made by testing it to a larger cohort of subjects, possibly  
668 investigating also lower SC tracts, including thoracic and lumbar districts, and extending studies to  
669 different clinical cases, preferably focusing on a determined pathology. For example, it would be  
670 interesting to explore long-term correlations between DKI measures and specific clinical scores as  
671 done in (82), where diffusion measures have been related to motor performance indexes.

672 A further step may be adapting this analysis pipeline to other promising higher-order diffusion  
673 models requiring multi-shell acquisition such as NODDI (95).

674

#### 675 5. Conclusion

676 In this work, we have showed how accurate adjustment and parameters' tuning of processing  
677 algorithms customized for adult SC opens up new horizons in exploiting increased ability of  
678 advanced dMRI models, also in neonatal domain, where they had never been utilized before.

679 Indeed, even starting from low quality data acquired for diagnostic purposes and thus suboptimal,  
680 we were able to extract from DKI information of some diagnostic use.

681 The case study proposed in this paper is just an example of the potential relapses of this semi-  
682 automated pipeline, which paves the wave for applying advanced dMRI models to neonatal setting  
683 in a wide range of potential clinical applications. In particular, the possibility of successfully  
684 exploiting increased sensitivity and sensibility inherent to DKI methodology also into neonatal  
685 setting would indeed be extremely useful for throwing light on complex diseases related to this  
686 critical phase of development and to deepen the knowledge about the relationship between brain  
687 and SC at birth.

688

689

## 690 Declaration of interest

691 Declarations of interest: none

692

## 693 Author contributions

694 **Rosella Trò:** Conceptualization, Methodology, Software, Writing - Original Draft,  
695 Visualization. **Monica Roascio:** Conceptualization, Supervision. **Domenico Tortora:**  
696 Conceptualization, Validation, Investigation, Resources, Supervision. **Mariasavina Severino:**  
697 Validation, Investigation, Resources, Supervision. **Andrea Rossi:** Validation, Investigation,  
698 Resources, Supervision. **Julien Cohen-Adad:** Writing- Reviewing and Editing, Supervision.  
699 **Marco Massimo Fato:** Conceptualization, Writing- Reviewing and Editing, Supervision. **Gabriele**  
700 **Arnulfo:** Conceptualization, Writing- Reviewing and Editing, Supervision. **These last two**  
701 **authors contributed equally.**

## 702 Funding sources

703 This research did not receive any specific grant from funding agencies in the public, commercial, or  
704 not-for-profit sectors.

705

## 706 Acknowledgements

707 The authors would like to thank Prof. Luca Antonio Ramenghi (Neonatal Intensive Care Unit,  
708 IRCCS Istituto Giannina Gaslini, Genoa, Italy e Department of Neurosciences, Rehabilitation,  
709 Ophthalmology, Genetics, Maternal and Child Health (DINOEMI), University of Genoa, Italy) and  
710 the LIFT (Laboratorio di Imaging Funzionale 3 Tesla).

711

## 712 Data and code availability

713 Data used in this study is not able to be made openly available due to privacy restrictions of clinical  
714 data imposed by the Gaslini Hospital's administration. Regarding code availability, a specific  
715 pipeline compatible with SCT is integrated in an open-access GitHub repository within "SCT-  
716 pipeline", a site gathering various pipelines compatible with SCT for processing MRI data  
717 (<https://github.com/sct-pipeline/pediatric-genova>).

718

719

## 720 Supplementary material

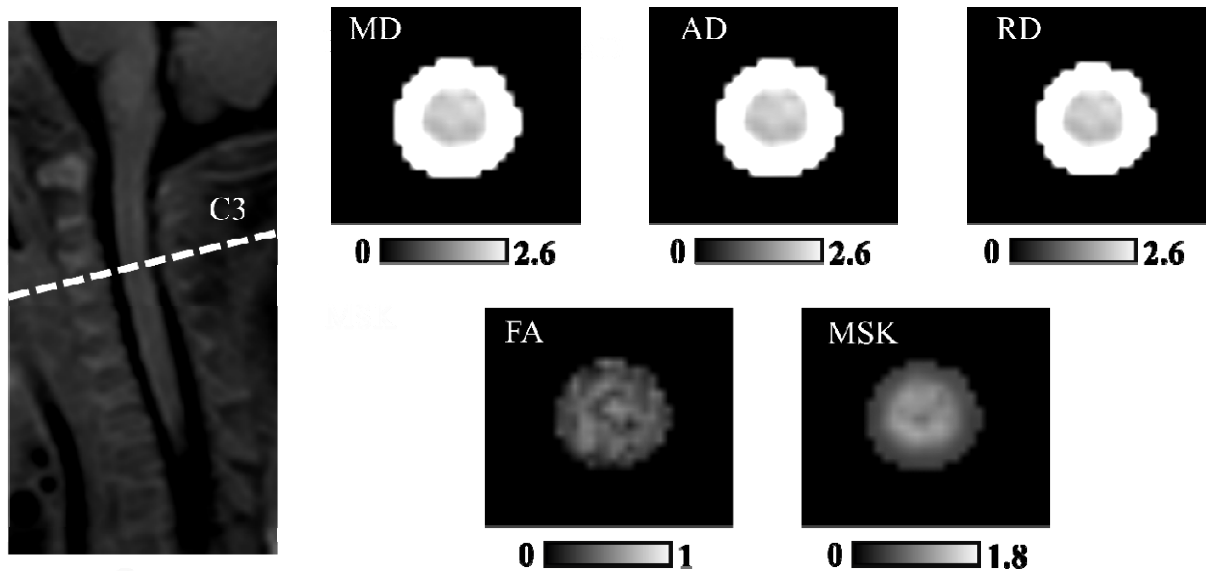

721

722 **Figure 1S. Diffusion and kurtosis maps at the mid-C3 level for one example subject: Units for**

723

MD, AD and RD are  $\mu\text{m}^2/\text{s}$ , for MSK  $\text{mm}^2/\text{s}$ , while FA is dimensionless.

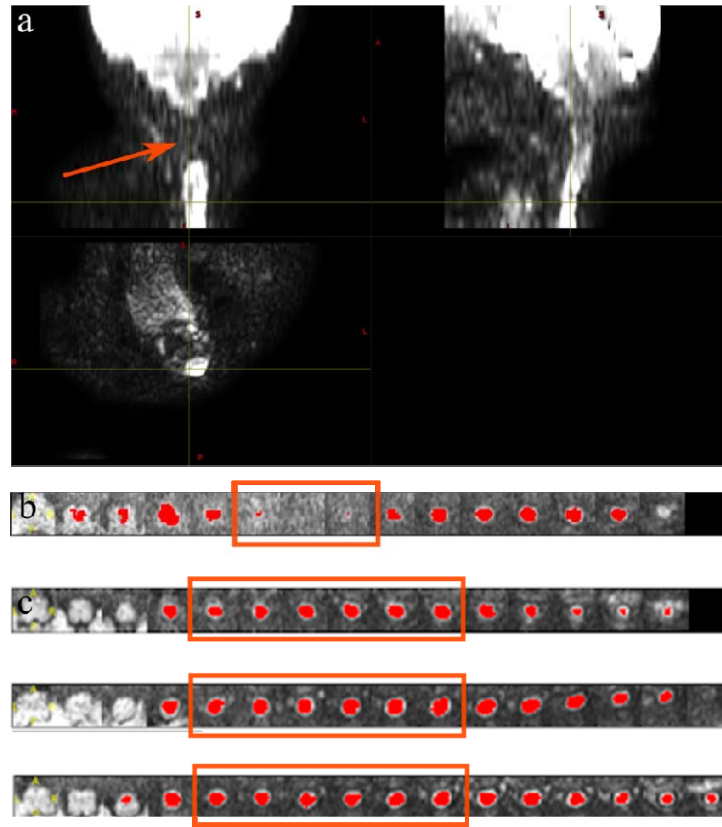

724

725 **Figure 2S. Quality control:** (a) Example of excluded DKI scan and (b) relative SC segmentation  
726 show signal loss across multiple slices as the coronal plane is not overlapping with the cord (ie:  
727 lordosis); (c) QC of C1-C4 levels: axial slices under analysis correspond to the same cervical levels  
728 for all subjects as shown in three example subjects.

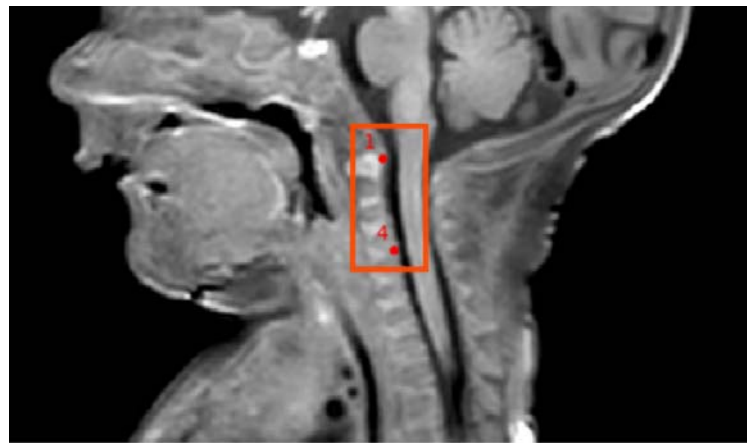

729

730 **Figure 3S. Vertebral labeling:** Manual labeling of top of C1 vertebra and C3-C4 disc from  
 731 graphical user interface integrated in SCT

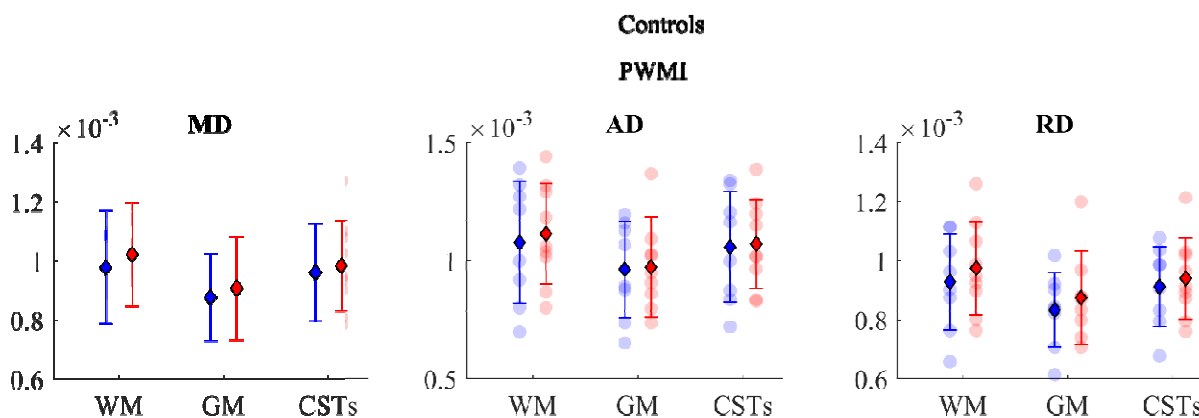

732  
 733  
 734 **Figure 4S. Extraction of diffusion measures within specific ROIs:** Scatter plots of DTI in group  
 735 subjects across aforementioned ROIs: coloured spots indicate single subject's value for each metric;  
 736 as reported in the legend, controls' measures are in blue, whereas Periventricular White Matter  
 737 Injury (PWMI) group's in red. Units for MD, AD, RD are in  $\text{mm}^2/\text{s}$ . Error bars displaying mean  
 738 (diamond) and standard deviation (bars) are overlaid on scatter plots.

739

## 740 References

- 741 1. Tournier JD. Diffusion MRI in the brain – Theory and concepts. *Progress in Nuclear*  
 742 *Magnetic Resonance Spectroscopy* (2019) doi:10.1016/j.pnmrs.2019.03.001
- 743 2. Jensen JH, Helpert JA, Ramani A, Lu H, Kaczynski K. Diffusional kurtosis imaging: The  
 744 quantification of non-Gaussian water diffusion by means of magnetic resonance imaging.  
 745 *Magnetic Resonance in Medicine* (2005) doi:10.1002/mrm.20508
- 746 3. Farquharson S, Tournier JD, Calamante F, Fabinyi G, Schneider-Kolsky M, Jackson GD,  
 747 Connelly A. White matter fiber tractography: Why we need to move beyond DTI. *Journal of*  
 748 *Neurosurgery* (2013) doi:10.3171/2013.2.JNS121294
- 749 4. Loucao R, Nunes RG, Neto-Henriques R, Correia M, Ferreira H. Human brain tractography:  
 750 A DTI vs DKI comparison analysis. in doi:10.1109/enbeng.2015.7088820
- 751 5. Mader I, Urbach H. Walk the line: From diffusion imaging to the microstructure of the brain.  
 752 *Clinical Neuroradiology* (2013) doi:10.1007/s00062-013-0265-3
- 753 6. Cohen Y, Anaby D, Morozov D. Diffusion MRI of the spinal cord: from structural studies to  
 754 pathology. *NMR in Biomedicine* (2017) doi:10.1002/nbm.3592

- 755 7. Wu EX, Cheung MM. MR diffusion kurtosis imaging for neural tissue characterization. *NMR*  
756 *in Biomedicine* (2010) doi:10.1002/nbm.1506
- 757 8. Taber KH, Herrick RC, Weathers SW, Kumar A, Schomer DF, Hayman LA. Pitfalls and  
758 Encountered Clinical Artifacts in Imaging of the Spine1. *Radiographics* □: a review  
759 *publication of the Radiological Society of North America, Inc* (1998)
- 760 9. Panara V, Navarra R, Mattei PA, Piccirilli E, Cotroneo AR, Papinutto N, Henry RG, Uncini  
761 A, Caulo M. Spinal cord microstructure integrating phase-sensitive inversion recovery and  
762 diffusional kurtosis imaging. *Neuroradiology* (2017) doi:10.1007/s00234-017-1864-5
- 763 10. Li D, Wang X. Application value of diffusional kurtosis imaging (DKI) in evaluating  
764 microstructural changes in the spinal cord of patients with early cervical spondylotic  
765 myelopathy. *Clinical Neurology and Neurosurgery* (2017)  
766 doi:10.1016/j.clineuro.2017.03.015
- 767 11. Bester M, Sigmund E, Tabesh A, Jaggi H, Inglese M, Mitnick R. Diffusional Kurtosis  
768 Imaging of the cervical spinal cord in multiple sclerosis patients. *Proc Intl Soc Mag Reson*  
769 *Med* (2010)
- 770 12. Bester M, Sigmund E, Tabesh A, Jaggi H, Inglese M, Mitnick R. Diffusional Kurtosis  
771 Imaging of the cervical spinal cord in multiple sclerosis patients. in
- 772 13. Raz E, Bester M, Sigmund EE, Tabesh A, Babb JS, Jaggi H, Helpem J, Mitnick RJ, Inglese  
773 M. A better characterization of spinal cord damage in multiple sclerosis: A diffusional  
774 kurtosis imaging study. in *American Journal of Neuroradiology* doi:10.3174/ajnr.A3512
- 775 14. Li D-W, Wang X-M. Progresses of diffusion kurtosis imaging in spinal cord injury. (2015)  
776 31:1422–1425. doi:10.13929/j.1003-3289.2015.09.036
- 777 15. Sorantin E, Robl T, Lindbichler F, Riccabona M. MRI of the neonatal and paediatric spine  
778 and spinal canal. *European Journal of Radiology* (2008) doi:10.1016/j.ejrad.2008.06.032
- 779 16. Thukral BB. Problems and preferences in pediatric imaging. *Indian Journal of Radiology*  
780 *and Imaging* (2015) doi:10.4103/0971-3026.169466
- 781 17. Wilm BJ, Svensson J, Henning A, Pruessmann KP, Boesiger P, Kollias SS. Reduced field-of-  
782 view MRI using outer volume suppression for spinal cord diffusion imaging. *Magnetic*  
783 *Resonance in Medicine* (2007) doi:10.1002/mrm.21167
- 784 18. Toselli B, Tortora D, Severino M, Arnulfo G, Canessa A, Morana G, Rossi A, Fato MM.  
785 Improvement in white matter tract reconstruction with constrained spherical deconvolution  
786 and track density mapping in low angular resolution data: A pediatric study and literature  
787 review. *Frontiers in Pediatrics* (2017) doi:10.3389/fped.2017.00182
- 788 19. Webster JG, Descoteaux M. “High Angular Resolution Diffusion Imaging (HARDI),” in  
789 *Wiley Encyclopedia of Electrical and Electronics Engineering*  
790 doi:10.1002/047134608x.w8258



- 791 20. Andre JB, Bammer R. Advanced diffusion-weighted magnetic resonance imaging techniques  
792 of the human spinal cord. *Topics in Magnetic Resonance Imaging* (2010)  
793 doi:10.1097/RMR.0b013e31823e65a1
- 794 21. Fruehwald-Pallamar J, Szomolanyi P, Fakhrain N, Lunzer A, Weber M, Thurnher MM,  
795 Pallamar M, Trattinig S, Prayer D, Noebauer-Huhmann IM. Parallel imaging of the cervical  
796 spine at 3T: Optimized trade-off between speed and image quality. *American Journal of*  
797 *Neuroradiology* (2012) doi:10.3174/ajnr.A3101
- 798 22. Saksena S, Alizadeh M, Middleton DM, Conklin CJ, Krisa L, Flanders A, Mulcahey M,  
799 Mohamed FB, Faro SH. Characterization of spinal cord diffusion tensor imaging metrics in  
800 clinically asymptomatic pediatric subjects with incidental congenital lesions. *Spinal Cord*  
801 *Series and Cases* (2018) doi:10.1038/s41394-018-0073-8
- 802 23. Alizadeh M, Fisher J, Saksena S, Sultan Y, Conklin CJ, Middleton DM, Krisa L,  
803 Finsterbusch J, Flanders AE, Faro SH, et al. Age related diffusion and tractography changes  
804 in typically developing pediatric cervical and thoracic spinal cord. *NeuroImage: Clinical*  
805 (2018) doi:10.1016/j.nicl.2018.03.014
- 806 24. Alizadeh M, Fisher J, Saksena S, Sultan Y, Conklin CJ, Middleton DM, Finsterbusch J, Krisa  
807 L, Flanders AE, Faro SH, et al. Reduced Field of View Diffusion Tensor Imaging and Fiber  
808 Tractography of the Pediatric Cervical and Thoracic Spinal Cord Injury. *Journal of*  
809 *Neurotrauma* (2018) doi:10.1089/neu.2017.5174
- 810 25. Mulcahey MJ, Samdani AF, Gaughan JP, Barakat N, Faro S, Shah P, Betz RR, Mohamed  
811 FB. Diagnostic accuracy of diffusion tensor imaging for pediatric cervical spinal cord injury.  
812 *Spinal Cord* (2013) doi:10.1038/sc.2013.36
- 813 26. Saksena S, Middleton DM, Krisa L, Shah P, Faro SH, Sinko R, Gaughan J, Finsterbusch J,  
814 Mulcahey MJ, Mohamed FB. Diffusion tensor imaging of the normal cervical and thoracic  
815 pediatric spinal cord. *American Journal of Neuroradiology* (2016) doi:10.3174/ajnr.A4883
- 816 27. Mohamed FB, Hunter LN, Barakat N, Liu CSJ, Sair H, Samdani AF, Betz RR, Faro SH,  
817 Gaughan J, Mulcahey MJ. Diffusion tensor imaging of the pediatric spinal cord at 1.5T:  
818 Preliminary results. *American Journal of Neuroradiology* (2011) doi:10.3174/ajnr.A2334
- 819 28. Antherieu P, Levy R, de Saint Denis T, Lohkamp L, Paternoster G, di Rocco F, Boddart N,  
820 Zerah M. Diffusion tensor imaging (DTI) and Tractography of the spinal cord in pediatric  
821 population with spinal lipomas: preliminary study. *Child's Nervous System* (2019)  
822 doi:10.1007/s00381-018-3935-2
- 823 29. Reynolds BB, By S, Weinberg QR, Witt AA, Newton AT, Feiler HR, Ramkorun B, Clayton  
824 DB, Couture P, Martus JE, et al. Quantification of DTI in the pediatric spinal cord:  
825 Application to clinical evaluation in a healthy patient population. *American Journal of*  
826 *Neuroradiology* (2019) doi:10.3174/ajnr.A6104
- 827 30. Singhi S, Tekes A, Thurnher M, Gilson WD, Izbudak I, Thompson CB, Huisman TAGM.  
828 Diffusion tensor imaging of the maturing paediatric cervical spinal cord: From the neonate to  
829 the young adult. *Journal of Neuroradiology* (2012) doi:10.1016/j.neurad.2011.05.002

- 830 31. Saksena S, Mohamed FB, Middleton DM, Krisa L, Alizadeh M, Shahrapour S, Conklin CJ,  
831 Flanders A, Finsterbusch J, Mulcahey MJ, et al. Diffusion Tensor Imaging Assessment of  
832 Regional White Matter Changes in the Cervical and Thoracic Spinal Cord in Pediatric  
833 Subjects. *Journal of Neurotrauma* (2018) 36:853–861. doi:10.1089/neu.2018.5826
- 834 32. Conklin CJ, Middleton DM, Alizadeh M, Finsterbusch J, Raunig DL, Faro SH, Shah P, Krisa  
835 L, Sinko R, Delalic JZ, et al. Spatially selective 2D RF inner field of view (iFOV) diffusion  
836 kurtosis imaging (DKI) of the pediatric spinal cord. *NeuroImage: Clinical* (2016)  
837 doi:10.1016/j.nicl.2016.01.009
- 838 33. Singh G, True AJ, Lui CC, Prasanna P, Orleans G, Partyka L, Phatak TD. Normal anterior-  
839 posterior diameters of the spinal cord and spinal canal in healthy term newborns on  
840 sonography. *Pediatric Radiology* (2020) doi:10.1007/s00247-020-04879-8
- 841 34. Kaplan KM, Spivak JM, Bendo JA. Embryology of the spine and associated congenital  
842 abnormalities. *Spine Journal* (2005) doi:10.1016/j.spinee.2004.10.044
- 843 35. Oskouian RJ, Sansur CA, Shaffrey CI. Congenital Abnormalities of the Thoracic and  
844 Lumbar Spine. *Neurosurgery Clinics of North America* (2007)  
845 doi:10.1016/j.nec.2007.04.004
- 846 36. Rufener S, Ibrahim M, Parmar HA. Imaging of Congenital Spine and Spinal Cord  
847 Malformations. *Neuroimaging Clinics of North America* (2011)  
848 doi:10.1016/j.nic.2011.05.011
- 849 37. S Basu P, Elsebaie H, Noordeen M. Congenital spinal deformity: A comprehensive  
850 assessment at presentation. *Spine* (2002) doi:10.1097/00007632-200210150-00014
- 851 38. Yang RK, Roth CG, Ward RJ, deJesus JO, Mitchell DG. Optimizing abdominal MR  
852 imaging: Approaches to common problems. *Radiographics* (2010)  
853 doi:10.1148/rg.301095076
- 854 39. Tournier JD, Smith R, Raffelt D, Tabbara R, Dhollander T, Pietsch M, Christiaens D,  
855 Jeurissen B, Yeh CH, Connelly A. MRtrix3: A fast, flexible and open software framework  
856 for medical image processing and visualisation. *NeuroImage* (2019)  
857 doi:10.1016/j.neuroimage.2019.116137
- 858 40. de Leener B, Lévy S, Dupont SM, Fonov VS, Stikov N, Louis Collins D, Callot V, Cohen-  
859 Adad J. SCT: Spinal Cord Toolbox, an open-source software for processing spinal cord MRI  
860 data. *NeuroImage* (2017) doi:10.1016/j.neuroimage.2016.10.009
- 861 41. Garyfallidis E, Brett M, Amirbekian B, Rokem A, van der Walt S, Descoteaux M, Nimmo-  
862 Smith I. Dipy, a library for the analysis of diffusion MRI data. *Frontiers in Neuroinformatics*  
863 (2014) doi:10.3389/fninf.2014.00008
- 864 42. Battiston M, Grussu F, Ianus A, Schneider T, Prados F, Fairney J, Ourselin S, Alexander DC,  
865 Cercignani M, Gandini Wheeler-Kingshott CAM, et al. An optimized framework for  
866 quantitative magnetization transfer imaging of the cervical spinal cord in vivo. *Magnetic  
867 Resonance in Medicine* (2018) doi:10.1002/mrm.26909

- 868 43. Brooks JCW, Büchel C, Winkler AM, Andersson JL, Tracey I. Investigating resting-state  
869 functional connectivity in the cervical spinal cord at 3 T. *NeuroImage* (2017)  
870 doi:10.1016/j.neuroimage.2016.12.072
- 871 44. Duval T, Lévy S, Stikov N, Cohen-Adad J, Stikov N, Campbell J, Mezer A, Witzel T, Keil  
872 B, Smith V, et al. g-Ratio weighted imaging of the human spinal cord in vivo. *NeuroImage*  
873 (2017) doi:10.1016/j.neuroimage.2016.09.018
- 874 45. Eippert F, Kong Y, Jenkinson M, Tracey I, Brooks JCW. Denoising spinal cord fMRI data:  
875 Approaches to acquisition and analysis. *NeuroImage* (2017)  
876 doi:10.1016/j.neuroimage.2016.09.065
- 877 46. Kong Y, Eippert F, Beckmann CF, Andersson J, Finsterbusch J, Büchel C, Tracey I, Brooks  
878 JCW. Intrinsically organized resting state networks in the human spinal cord. *Proceedings of*  
879 *the National Academy of Sciences of the United States of America* (2014)  
880 doi:10.1073/pnas.1414293111
- 881 47. Samson RS, Lévy S, Schneider T, Smith AK, Smith SA, Cohen-Adad J, Wheeler-Kingshott  
882 CAMG. ZOOM or Non-ZOOM? Assessing spinal cord diffusion tensor imaging protocols  
883 for multi-centre studies. *PLoS ONE* (2016) doi:10.1371/journal.pone.0155557
- 884 48. Massire A, Taso M, Besson P, Guye M, Ranjeva JP, Callot V. High-resolution multi-  
885 parametric quantitative magnetic resonance imaging of the human cervical spinal cord at 7T.  
886 *NeuroImage* (2016) doi:10.1016/j.neuroimage.2016.08.055
- 887 49. Taso M, Girard OM, Duhamel G, le Troter A, Feiweier T, Guye M, Ranjeva JP, Callot V.  
888 Tract-specific and age-related variations of the spinal cord microstructure: A multi-  
889 parametric MRI study using diffusion tensor imaging (DTI) and inhomogeneous  
890 magnetization transfer (ihMT). *NMR in Biomedicine* (2016) doi:10.1002/nbm.3530
- 891 50. Vahdat S, Lungu O, Cohen-Adad J, Marchand-Pauvert V, Benali H, Doyon J. Simultaneous  
892 brain–cervical cord fMRI reveals intrinsic spinal cord plasticity during motor sequence  
893 learning. *PLoS Biology* (2015) doi:10.1371/journal.pbio.1002186
- 894 51. Weber KA, Sentis AI, Bernadel-Huey ON, Chen Y, Wang X, Parrish TB, Mackey S.  
895 Thermal Stimulation Alters Cervical Spinal Cord Functional Connectivity in Humans.  
896 *Neuroscience* (2018) doi:10.1016/j.neuroscience.2017.10.035
- 897 52. Weber KA, Chen Y, Wang X, Kahnt T, Parrish TB. Lateralization of cervical spinal cord  
898 activity during an isometric upper extremity motor task with functional magnetic resonance  
899 imaging. *NeuroImage* (2016) doi:10.1016/j.neuroimage.2015.10.014
- 900 53. Ljungberg E, Vavasour I, Tam R, Yoo Y, Rauscher A, Li DKB, Traboulsee A, MacKay A,  
901 Kolind S. Rapid myelin water imaging in human cervical spinal cord. *Magnetic Resonance in*  
902 *Medicine* (2017) doi:10.1002/mrm.26551
- 903 54. Castellano A, Papinutto N, Cadioli M, Brugnara G, Iadanza A, Scigliuolo G, Pareyson D,  
904 Uziel G, Köhler W, Aubourg P, et al. Quantitative MRI of the spinal cord and brain in

- 905        adrenomyeloneuropathy: In vivo assessment of structural changes. *Brain* (2016)  
906        doi:10.1093/brain/aww068
- 907    55.    Grabher P, Mohammadi S, Trachsler A, Friedl S, David G, Sutter R, Weiskopf N, Thompson  
908        AJ, Curt A, Freund P. Voxel-based analysis of grey and white matter degeneration in cervical  
909        spondylotic myelopathy. *Scientific Reports* (2016) doi:10.1038/srep24636
- 910    56.    Hori M, Hagiwara A, Fukunaga I, Ueda R, Kamiya K, Suzuki Y, Liu W, Murata K,  
911        Takamura T, Hamasaki N, et al. Application of Quantitative Microstructural MR Imaging  
912        with Atlas-based Analysis for the Spinal Cord in Cervical Spondylotic Myelopathy.  
913        *Scientific Reports* (2018) doi:10.1038/s41598-018-23527-8
- 914    57.    Huber E, David G, Thompson AJ, Weiskopf N, Mohammadi S, Freund P. Dorsal and ventral  
915        horn atrophy is associated with clinical outcome after spinal cord injury. *Neurology* (2018)  
916        doi:10.1212/WNL.0000000000005361
- 917    58.    McCoy DB, Talbott JF, Wilson M, Mamlouk MD, Cohen-Adad J, Wilson M, Narvid J. MRI  
918        atlas-based measurement of spinal cord injury predicts outcome in acute flaccid myelitis.  
919        *American Journal of Neuroradiology* (2017) doi:10.3174/ajnr.A5044
- 920    59.    Martin AR, de Leener B, Cohen-Adad J, Cadotte DW, Kalsi-Ryan S, Lange SF, Tetreault L,  
921        Nouri A, Crawley A, Mikulis DJ, et al. A novel MRI biomarker of spinal cord white matter  
922        injury: T2\*-weighted white matter to gray matter signal intensity ratio. *American Journal of*  
923        *Neuroradiology* (2017) doi:10.3174/ajnr.A5162
- 924    60.    Smith AC, Weber KA, O'Dell DR, Parrish TB, Wasielewski M, Elliott JM. Lateral  
925        Corticospinal Tract Damage Correlates With Motor Output in Incomplete Spinal Cord Injury.  
926        *Archives of Physical Medicine and Rehabilitation* (2018) doi:10.1016/j.apmr.2017.10.002
- 927    61.    Talbott JF, Narvid J, Chazen JL, Chin CT, Shah V. An Imaging-Based Approach to Spinal  
928        Cord Infection. *Seminars in Ultrasound, CT and MRI* (2016) doi:10.1053/j.sult.2016.05.006
- 929    62.    Ventura RE, Kister I, Chung S, Babb JS, Shepherd TM. Cervical spinal cord atrophy in  
930        nmsd without a history of myelitis or MRI-visible lesions. *Neurology: Neuroimmunology*  
931        *and NeuroInflammation* (2016) doi:10.1212/NXI.0000000000000224
- 932    63.    Yiannakas MC, Mustafa AM, de Leener B, Kearney H, Tur C, Altmann DR, de Angelis F,  
933        Plantone D, Ciccarelli O, Miller DH, et al. Fully automated segmentation of the cervical cord  
934        from T1-weighted MRI using PropSeg: Application to multiple sclerosis. *NeuroImage:*  
935        *Clinical* (2016) doi:10.1016/j.nicl.2015.11.001
- 936    64.    Barth M, Breuer F, Koopmans PJ, Norris DG, Poser BA. Imaging Methodology - Review  
937        Simultaneous Multislice (SMS) Imaging Techniques. *Magnetic Resonance in Medicine*  
938        (2016)
- 939    65.    Fadnavis S, Batson J, Garyfallidis E. Patch2Self: Denoising Diffusion MRI with Self-  
940        Supervised Learning. (2020)1–11. Available at: <http://arxiv.org/abs/2011.01355>

- 941 66. Schilling K, Fadnavis S, Visagie M, Garyfallidis E, Landman B, Smith S, O'grady K.  
942 Patch2Self denoising of diffusion MRI in the cervical spinal cord improves repeatability and  
943 feature conspicuity. in
- 944 67. Xu J, Shimony JS, Klawiter EC, Snyder AZ, Trinkaus K, Naismith RT, Benzinger TLS,  
945 Cross AH, Song SK. Improved in vivo diffusion tensor imaging of human cervical spinal  
946 cord. *NeuroImage* (2013) doi:10.1016/j.neuroimage.2012.11.014
- 947 68. de Leener B, Kadoury S, Cohen-Adad J. Robust, accurate and fast automatic segmentation of  
948 the spinal cord. *NeuroImage* (2014) doi:10.1016/j.neuroimage.2014.04.051
- 949 69. Gros C, de Leener B, Badji A, Maranzano J, Eden D, Dupont SM, Talbott J, Zhuoquiong R,  
950 Liu Y, Granberg T, et al. Automatic segmentation of the spinal cord and intramedullary  
951 multiple sclerosis lesions with convolutional neural networks. *NeuroImage* (2019)  
952 doi:10.1016/j.neuroimage.2018.09.081
- 953 70. Ullmann E, Pelletier Paquette JF, Thong WE, Cohen-Adad J. Automatic Labeling of  
954 Vertebral Levels Using a Robust Template-Based Approach. *International Journal of*  
955 *Biomedical Imaging* (2014) doi:10.1155/2014/719520
- 956 71. de Leener B, Fonov VS, Collins DL, Callot V, Stikov N, Cohen-Adad J. PAM50: Unbiased  
957 multimodal template of the brainstem and spinal cord aligned with the ICBM152 space.  
958 *NeuroImage* (2018) doi:10.1016/j.neuroimage.2017.10.041
- 959 72. de Leener B, Mangeat G, Dupont S, Martin AR, Callot V, Stikov N, Fehlings MG, Cohen-  
960 Adad J. Topologically preserving straightening of spinal cord MRI. *Journal of Magnetic*  
961 *Resonance Imaging* (2017) doi:10.1002/jmri.25622
- 962 73. Tustison NJ, Avants BB. Explicit B-spline regularization in diffeomorphic image  
963 registration. *Frontiers in Neuroinformatics* (2013) doi:10.3389/fninf.2013.00039
- 964 74. Henriques RN, Correia MM, Marrale M, Huber E, Kruper J, Koudoro S, Yeatman JD,  
965 Garyfallidis E, Rokem A. Diffusional Kurtosis Imaging in the Diffusion Imaging in Python  
966 Project. *Frontiers in Human Neuroscience* (2021) doi:10.3389/fnhum.2021.675433
- 967 75. Lévy S, Benhamou M, Naaman C, Rainville P, Callot V, Cohen-Adad J. White matter atlas  
968 of the human spinal cord with estimation of partial volume effect. *NeuroImage* (2015)  
969 doi:10.1016/j.neuroimage.2015.06.040
- 970 76. Tax CMW, Otte WM, Viergever MA, Dijkhuizen RM, Leemans A. REKINDLE: Robust  
971 Extraction of Kurtosis INDices with Linear Estimation. *Magnetic Resonance in Medicine*  
972 (2015) doi:10.1002/mrm.25165
- 973 77. Neto Henriques R. Diffusion kurtosis imaging of the healthy human brain. (2012)134.  
974 Available at: <http://repositorio.ul.pt/handle/10451/8511>
- 975 78. Henriques RN, Jespersen SN, Jones DK, Veraart J. Toward more robust and reproducible  
976 diffusion kurtosis imaging. *Magnetic Resonance in Medicine* (2021) doi:10.1002/mrm.28730

- 977 79. Henriques RN. Advanced Methods for Diffusion MRI Data Analysis and their Application to  
978 the Healthy Ageing Brain. (2017)
- 979 80. Neto Henriques R, Correia MM, Nunes RG, Ferreira HA. Exploring the 3D geometry of the  
980 diffusion kurtosis tensor-Impact on the development of robust tractography procedures and  
981 novel biomarkers. *NeuroImage* (2015) doi:10.1016/j.neuroimage.2015.02.004
- 982 81. Henriques RN, Jespersen SN, Shemesh N. Microscopic anisotropy misestimation in  
983 spherical-mean single diffusion encoding MRI. *Magnetic Resonance in Medicine* (2019)  
984 doi:10.1002/mrm.27606
- 985 82. Panara V, Navarra R, Mattei PA, Piccirilli E, Bartoletti V, Uncini A, Caulo M. Correlations  
986 between cervical spinal cord magnetic resonance diffusion tensor and diffusion kurtosis  
987 imaging metrics and motor performance in patients with chronic ischemic brain lesions of the  
988 corticospinal tract. *Neuroradiology* (2019) doi:10.1007/s00234-018-2139-5
- 989 83. Volpe JJ, Inder TE, Darras BT, de Vries LS, du Plessis AJ, Neil JJ, Perlman J. *Volpe's*  
990 *neurology of the newborn*. (2017). doi:10.1016/c2010-0-68825-0
- 991 84. Veraart J, Novikov DS, Christiaens D, Ades-aron B, Sijbers J, Fieremans E. Denoising of  
992 diffusion MRI using random matrix theory. *NeuroImage* (2016)  
993 doi:10.1016/j.neuroimage.2016.08.016
- 994 85. Hastie T, Tibshirani R, Friedman J. *The Elements of Statistical Learning Data Mining,*  
995 *Inference, and Prediction (12th printing)*. (2017).
- 996 86. Pierpaoli C, Basser PJ. Toward a quantitative assessment of diffusion anisotropy. *Magnetic*  
997 *Resonance in Medicine* (1996) doi:10.1002/mrm.1910360612
- 998 87. Pierpaoli C, Jezzard P, Basser PJ, Barnett A, di Chiro G. Diffusion tensor MR imaging of the  
999 human brain. *Radiology* (1996) doi:10.1148/radiology.201.3.8939209
- 1000 88. Parodi A, Malova M, Cardiello V, Raffa S, Re M, Calevo MG, Severino M, Tortora D,  
1001 Morana G, Rossi A, et al. Punctate white matter lesions of preterm infants: Risk factor  
1002 analysis. *European Journal of Paediatric Neurology* (2019) doi:10.1016/j.ejpn.2019.06.003
- 1003 89. Cheong JLY, Thompson DK, Wang HX, Hunt RW, Anderson PJ, Inder TE, Doyle LW.  
1004 Abnormal white matter signal on MR imaging is related to abnormal tissue microstructure.  
1005 *American Journal of Neuroradiology* (2009) doi:10.3174/ajnr.A1399
- 1006 90. Staudt M, Pavlova M, Böhm S, Grodd W, Krägeloh-Mann I. Pyramidal tract damage  
1007 correlates with motor dysfunction in bilateral periventricular leukomalacia (PVL).  
1008 *Neuropediatrics* (2003) doi:10.1055/s-2003-42206
- 1009 91. Bassi L, Chew A, Merchant N, Ball G, Ramenghi L, Boardman J, Allsop JM, Doria V,  
1010 Arichi T, Mosca F, et al. Diffusion tensor imaging in preterm infants with punctate white  
1011 matter lesions. *Pediatric Research* (2011) doi:10.1203/PDR.0b013e3182182836

- 1012 92. Tusor N, Benders MJ, Counsell SJ, Nongena P, Ederies MA, Falconer S, Chew A, Gonzalez-  
1013 Cinca N, Hajnal J v., Gangadharan S, et al. Punctate White Matter Lesions Associated with  
1014 Altered Brain Development and Adverse Motor Outcome in Preterm Infants. *Scientific*  
1015 *Reports* (2017) doi:10.1038/s41598-017-13753-x
- 1016 93. Paydar A, Fieremans E, Nwankwo JI, Lazar M, Sheth HD, Adisetiyo V, Helpert JA, Jensen  
1017 JH, Milla SS. Diffusional kurtosis imaging of the developing brain. *American Journal of*  
1018 *Neuroradiology* (2014) doi:10.3174/ajnr.A3764
- 1019 94. Hansen B. An Introduction to Kurtosis Fractional Anisotropy. *AJNR American journal of*  
1020 *neuroradiology* (2019) 40:1638–1641. doi:10.3174/ajnr.A6235
- 1021 95. Zhang H, Schneider T, Wheeler-Kingshott CA, Alexander DC. NODDI: Practical in vivo  
1022 neurite orientation dispersion and density imaging of the human brain. *NeuroImage* (2012)  
1023 doi:10.1016/j.neuroimage.2012.03.072
- 1024
- 1025
- 1026
